# Supplementary material for: Aerosol climatology characterization over Bangladesh using ground-based and remotely sensed satellite measurements
Source: Oxford University Press journal article supplement (doi:10.1525/elementa.2021.000063), 2022-01-01
Supplement: zaman_et_al_2021_data_file.xlsx [file zaman_et_al_2021_data_file.xlsx]

## Sheet: EAE vs AAE
Relationship between extinction angstrom exponent (EAE) and absorption angstrom exponent (AAE)
				Data source: AERONET (https://aeronet.gsfc.nasa.gov/cgi-bin/webtool_inv_v3)
Time: 12:00:00 pm, Location: Dhaka (23.72839, 90.39819), Bhola (22.22668, 90.75642)
Dhaka (2012-2019)											Bhola (2013-2019)
Pre-monsoon		Monsoon		Post-monsoon		Winter					Pre-monsoon		Monsoon		Post-monsoon		Winter
AAE	EAE	AAE	EAE	AAE	EAE	AAE	EAE				EAE	AAE	EAE	AAE	EAE	AAE	EAE	AAE
1.20978	1.32894	2.03091	0.725437	1.03415	1.29316	1.19958	1.25426				1.43227	0.914084	1.08801	0.830178	1.22103	0.116033	1.38135	1.08652
1.00327	1.36738	2.14624	0.628171	0.890729	1.25022	1.20431	1.37067				1.42328	0.968796	0.902424	0.851448	1.02394	1.47371	1.27765	0.515213
0.918543	1.27152	1.27922	1.0547	1.06756	1.35195	1.1988	1.33806				1.4023	0.811167	0.737484	0.894957	1.2624	1.08936	1.23302	0.843753
1.19725	1.27002	0.82259	1.26228	1.27456	1.35653	1.70795	1.27431				1.31737	0.965326	0.766987	1.24707	1.17058	1.304	1.24195	0.186884
1.25988	1.29175	0.936211	1.3427	0.999691	1.36581	0.985113	1.23371				0.725227	1.37424	1.49575	1.08108	1.2488	1.19349	1.32479	0.295114
1.71172	1.37071	0.144137	0.935418	1.05106	1.3873	1.06037	1.15839				1.10491	1.0906			1.24754	1.11974	1.35201	1.14741
1.32071	1.21332	1.5653	1.03953	1.0376	1.13293	0.67907	1.16546				1.24104	1.30063			1.30285	1.32765	1.25488	0.951364
1.09676	1.35052	1.65733	0.864423	1.08313	1.22179	0.824301	1.06436				1.26076	1.22573			1.5353	0.362306	1.04753	1.82818
1.42973	0.951595	0.521113	1.0985	1.0046	1.29155	0.840045	1.1954				1.22512	1.50294			1.49814	0.727777	1.08909	1.21741
1.36761	1.05816	0.917924	1.23361	1.35228	1.3342	1.04545	1.23432				1.24003	1.46493			1.40859	0.804379	1.23857	1.29326
1.46046	1.21079	1.54431	1.04491	1.13871	1.30868	1.03255	1.2203				1.36833	1.35867			1.38245	1.15806	1.02507	1.3448
1.42585	1.46087	1.88152	1.1405	1.12019	1.33012	1.31741	1.18192				1.21138	1.46012			1.30811	1.25541	1.28006	1.65724
1.32487	0.965634	1.72677	1.04697	1.2871	1.25292	0.970327	1.1572				1.1782	1.89184			1.42442	1.24527	1.34025	1.63176
1.62561	0.793181	1.40058	1.07788	1.03401	1.2257	1.0954	1.35013				0.968004	1.57968			1.35169	0.688914	0.975415	1.47646
1.9019	1.24768	1.2978	1.13705	1.06357	1.28728	1.09702	1.21894				0.96175	1.71902			1.36368	0.955087	1.19434	1.02955
1.54046	1.02987	1.19259	1.4684	1.11094	1.20906	1.68903	0.868758				0.961042	1.73685			1.294	1.22244	0.923247	1.51901
1.35493	1.10908	1.1206	1.29757	1.24232	1.08914	1.2729	0.870833				0.856203	2.62775			1.63036	0.886454	1.06294	1.2629
1.96106	1.16593			1.26734	1.4254	1.14893	1.04596				1.39025	0.422492			1.36973	1.04855	1.13358	1.17512
1.75524	0.933844			1.04571	1.37454	0.99112	0.918962				1.30846	0.871431			1.33532	1.12816	1.22905	1.30957
1.60887	0.730709			1.0075	1.34584	0.720881	1.16797				1.29215	0.776411			1.31106	1.21523	1.23511	1.148
1.68558	1.01437			0.716618	1.43069	0.991743	1.01875				1.4866	1.34136			1.33668	1.31274	1.22653	1.35113
1.33179	1.48532			1.01979	1.46073	1.08497	1.09922				0.703316	1.66912			1.35926	1.1174	0.972171	1.50365
1.08481	1.47694			1.12117	1.42842	1.21686	1.21854				1.07969	1.18063			1.33167	1.13109	1.18586	1.34893
0.999684	1.32055			0.890236	1.4522	1.23188	1.24262				0.962312	1.23312			1.17688	1.30263	1.32099	1.42681
1.00866	1.41968			1.42332	1.44389	1.15088	1.13279				1.05261	0.501377			1.3428	1.15979	1.42742	1.47843
0.853564	1.27902			1.79912	1.29363	1.19264	1.31205				1.38694	1.00029			1.21981	0.869145	1.29656	1.66548
1.93738	0.958498			1.09168	1.15784	1.1121	0.825736				0.667173	0.376181			1.15711	1.52952	1.21799	1.34254
1.61417	0.997156			1.51847	1.08184	1.28249	0.943589				1.34203	1.16341			1.23803	0.996606	1.48078	1.02799
0.956106	0.880734			1.04597	1.22759	1.813	0.822596				1.29291	1.11788			1.41448	0.955925	1.03064	1.79485
1.1849	1.05512			1.28464	1.23913	1.45743	1.3937				1.39275	1.31204			1.34989	1.2022	1.21367	1.18501
1.29082	1.11329			1.15368	1.26037	2.05087	1.01147				1.24883	1.46165			1.42811	1.16074	1.23972	1.3859
0.953592	1.37526			1.36464	1.17128	1.21321	1.28692				1.57072	1.282			1.28051	0.895261	1.31226	1.02804
1.16067	1.27425			0.900312	1.16997	1.04439	1.31325				1.39035	1.35463			1.3762	1.24185	1.17079	1.25184
0.895725	1.15037			1.12149	1.25106	1.28405	1.31789				1.56854	1.35788			1.25991	1.28878	1.1875	1.16433
0.757563	1.14326			0.972272	1.27274	1.26558	1.3052				1.29964	1.52427			1.32014	1.15245	1.3176	1.28022
1.38658	1.22509			0.869045	1.27592	1.33935	1.33144				1.50878	1.26307			1.13804	1.14864	1.32999	1.21725
1.05031	1.28364			1.39621	1.29696	1.34444	1.31803				1.5132	1.30874			1.21627	1.21516	1.30158	1.38453
1.05145	1.18288			1.37034	1.22503	2.66924	0.376147				1.33254	1.31149			1.23954	0.930055	1.23186	1.39857
1.5772	0.878091			1.15293	1.25169	1.17812	1.04734				1.22477	1.37542			1.22736	1.33341	1.35295	1.34613
1.81931	0.946051			1.47311	1.17312	1.20581	0.897749				1.41263	1.19374			1.35511	1.21872	1.34956	1.39253
1.75022	1.04321			1.16253	1.28446	1.2812	1.17954				1.11557	2.23335			1.43146	1.15117	1.30295	1.59156
2.0807	1.19335			1.35386	1.1829	1.32591	1.08427				1.11487	1.78182			1.41556	1.24313	1.40841	1.19906
1.92958	1.10778			1.9413	1.21454	1.0938	0.94371				1.20208	0.811653			1.51996	1.29665	1.18726	1.21469
1.50099	1.31093			1.55442	1.30956	1.34126	1.1604				1.14099	1.74159			1.53811	0.794313	0.943672	1.36825
1.02367	1.19855			1.72766	1.41871	1.2315	1.10953				1.17356	1.47467			1.34812	1.3162	1.17819	1.56934
0.857306	0.989117			1.43854	1.3591	0.9056	1.44486				1.38921	1.42088			1.3814	1.15687	1.27556	0.825371
1.48007	1.03686			1.31484	1.22811	1.01373	1.42431				1.32025	1.01531			1.17809	1.0271	1.28057	1.6698
1.18497	1.01778			1.43188	1.39512	0.927875	1.26894				1.22108	2.05981			1.28308	1.16108	1.31623	1.46283
0.953912	1.09424			1.09165	1.41378	1.20655	1.37383				1.25332	1.78311			1.28287	1.60307	1.27982	0.754759
1.41661	1.18381			1.38575	1.37759	0.843275	0.991287				1.11679	1.6285			1.51515	1.0872	1.27272	1.06855
1.13876	1.25261			0.970604	1.33187	1.70325	1.26264				0.894956	2.04671			1.15507	1.30727	1.41169	1.14784
1.1412	1.21387			1.5928	1.46108	0.964864	1.06559				0.85516	1.96677			1.24616	1.30075	1.48991	1.2755
1.02923	0.990814			1.36705	1.40235	1.25999	1.22363				1.34609	1.47208			1.40161	1.37685	1.42081	1.43204
1.26197	1.16706			1.51013	1.24561	1.2821	1.27894				1.30178	1.79828			1.30729	1.3059	1.32119	1.61463
1.17443	1.30283			1.34645	1.26762	0.93366	1.19486				1.42255	1.54679			1.31965	1.31699	1.2626	1.47679
0.855541	0.927536			1.17897	1.26891	1.10636	1.14882				1.30378	1.7771			1.30316	1.46533	1.17513	1.42112
0.980273	1.35156			1.11765	1.27884	1.26192	1.2128				1.15418	1.44257			1.2983	1.4887	1.32455	1.3566
1.00116	0.953076			1.10049	1.35276	1.11315	1.23702				1.16954	1.98002			1.28171	1.22638	1.48639	1.17031
1.02467	1.02948			1.10103	1.54317	0.967123	1.22071				1.50006	1.21241			1.18436	1.2973	1.42797	1.31584
1.74384	1.4169			0.725302	1.53663	2.09008	1.34556				1.33823	1.39559			1.27949	1.31008	1.30587	1.43634
1.13917	0.947129			1.26387	1.31096	1.07619	1.21953				1.45257	1.6368			1.30691	1.34757	1.30551	1.29095
0.948077	1.1133			1.18599	1.2308	1.39089	1.36566				1.56738	1.16436			1.42644	0.749861	1.32278	1.78055
1.76168	1.1623			1.19894	1.23032	1.3379	1.29121				0.845543	0.400168			1.46022	0.818552	1.22963	1.39702
0.754777	1.11944			1.26943	1.22788	1.03899	1.2603				0.957634	1.39797					1.28399	1.30488
0.889427	1.1696			1.07854	1.2322	1.3189	1.1988				0.696235	1.11626					1.38952	1.11637
0.370233	1.14163			1.06419	1.22877	1.0771	1.07848				1.25263	1.06341					1.27387	1.4284
0.308925	1.07253			1.09061	1.19108	1.1632	1.13149				1.25409	0.993887					1.26795	1.48617
1.17934	1.33385			1.14846	1.25205	1.10709	1.12979				1.4003	1.11516					1.23735	1.34262
0.781254	1.34462			1.14764	1.06972	1.47183	1.09881				1.48651	0.724394					1.28168	1.60558
1.31191	1.33893			1.21878	1.18674	1.33691	1.07159				1.57254	0.756363					1.42235	1.36238
1.22714	1.21712			1.15614	1.03262	1.22391	1.09297				1.55582	1.08584					1.32967	1.35526
1.41351	1.41173			1.32114	1.30815	1.19758	1.13949				1.33374	0.620956					1.33076	1.34047
1.59104	1.30162			1.24311	1.23737	1.01628	1.23263				1.29513	1.10826					1.35322	1.06788
1.45142	1.26223			1.34477	1.29249	1.48283	1.29605				1.24816	1.06175					1.25971	0.238866
1.32793	1.1761			1.06278	1.41902	1.2042	1.38571				1.29117	1.11133					1.14389	0.847404
1.46955	1.22199			1.21134	1.33065	1.31809	1.43313				1.30099	1.11783					1.11181	0.635304
1.31265	1.43585			1.35773	1.27664	1.21984	1.38363				1.14388	1.19707					1.06798	0.455607
1.08304	1.42332			1.4197	0.923489	0.962342	1.60119				1.51362	1.28447					0.884881	0.787301
1.20819	1.33039			1.37143	1.51958	1.2243	1.32028				0.957091	1.51725					1.18211	0.578873
1.42996	1.41002			1.01829	1.31742	1.57857	1.3605				1.20364	1.10306					1.43142	0.600658
1.26785	1.26514			1.17043	1.35567	1.61608	1.30318				1.27895	1.44895					1.35797	0.463213
1.12249	1.21098			0.95601	1.27551	1.54345	1.18923				1.11634	1.16978					1.47302	0.445624
1.76711	1.34225			1.08532	1.32373	1.39388	1.06674				1.1473	1.5484					1.41526	0.393091
1.08627	1.40626			1.09723	1.16494	1.19427	0.794218				1.16491	1.45021					1.40502	0.400312
1.25897	1.3755			1.17765	1.12794	1.54064	0.945333				1.0596	1.3361					1.15541	0.313274
1.13198	1.40043			1.27647	1.22034	1.6938	1.005				1.2165	1.22792					1.20841	1.09299
0.883924	1.20628			1.30341	1.34087	1.72752	1.21859				1.2344	1.07021					1.26715	0.918676
1.51754	1.22098			1.27365	1.23524	1.6031	1.19583				0.899048	2.00302					1.43212	0.554228
1.04397	1.30479			2.18392	1.32231	2.02414	1.23428				1.02513	1.43032					1.45218	0.734526
0.985196	0.941141			1.50005	1.35691	2.0891	1.01143				0.930627	1.39051					1.32156	0.601862
0.825339	1.07754			1.54229	1.35268	1.66135	1.27988				0.972479	1.38712					1.21881	1.20115
1.17605	1.26305			1.47815	1.37442	1.84692	1.3108				1.1661	1.33909					1.29499	1.25705
1.34417	1.31705			1.0011	1.19377	1.07442	0.828407				1.27921	1.02164					1.25135	0.998672
1.32487	1.27979			1.01734	1.34055	0.898042	0.967917				1.1057	1.58091					1.15475	1.28035
1.21874	1.17596			0.901067	1.37366	1.51694	1.00433				1.11797	1.20419					1.23106	1.38327
1.26832	1.29154			1.11983	1.25944	1.26337	1.02833				0.874904	1.79432					1.11038	1.20998
1.33575	1.34659			1.08821	1.31778	0.879326	1.0558				1.11306	1.56218					1.21667	1.8642
1.33088	1.2931			0.93714	1.45039	1.08832	1.12371				1.24528	1.28313					1.14217	1.18155
1.49824	1.13434			0.8584	1.35926	0.820387	1.05458				1.19571	1.26246					1.29571	0.713339
1.66407	0.733208			0.882956	1.33502	1.11384	0.995151				1.21845	1.1203					1.31424	1.44868
1.65559	0.913657			0.447122	1.34042	1.33495	0.962264				1.03438	1.35466					1.23004	1.1862
1.50633	1.05688			1.28272	1.33179	1.1691	1.19422				1.20509	1.20548					1.15772	1.20347
1.4618	1.21958			1.87536	1.2631	1.08883	1.19898				0.923005	1.998					1.27564	1.37403
1.21758	1.33147			2.61985	0.347682	0.941622	1.16065				0.959372	1.75714					1.26158	1.11977
1.57551	1.212			1.71739	1.21137	1.21289	1.25974				1.24873	1.75372					1.22943	1.17748
1.37083	1.08455			1.24525	1.3985	0.97383	1.17746				1.29637	0.815894					1.21961	1.21135
1.47726	1.28781			1.49007	1.21044	0.797172	0.915822				1.03548	1.75796					1.32219	1.29789
1.60137	1.16693			2.01199	1.21107	1.04885	1.01141				1.21939	1.20613					0.992644	1.45148
1.60034	0.975457			1.17063	1.41833	1.30247	1.2728				1.33779	0.746421					0.771071	1.64039
1.4415	1.17472			1.11085	1.34341	2.19596	1.25248				1.1853	1.1233					1.06235	1.68756
1.44137	1.08485			1.59324	1.47079	0.982498	1.266				1.09532	1.53663					1.11349	1.19867
1.75779	0.724539			1.2233	1.49802	0.836864	1.1379				0.895594	0.243065					1.21284	1.39692
2.54583	0.34312			1.65719	1.3453	1.29744	1.37478				1.05383	1.3409					1.20939	1.34708
1.7406	1.2289			1.85848	1.34469	0.926091	1.32087				1.00894	1.54012					1.131	1.3037
1.73872	0.845677			1.7446	1.31953	1.07302	1.44831				1.03378	1.57507					1.1351	1.38956
1.30831	1.46379			1.63328	1.31636	1.07806	1.40224				1.07659	1.22397					1.21362	0.665375
2.4844	0.36474			1.64747	1.30858	1.1981	1.33337				1.16972	1.37219					1.20078	1.82982
2.07439	0.573584			1.73908	1.31579	1.1075	1.21139				1.04027	1.57731					1.13811	1.08929
3.08012	0.368261			1.74013	1.34187	1.09554	1.3401				1.02603	1.41484					1.27857	1.36999
1.84662	0.877721			1.53717	1.26408	0.9643	1.10976				1.20131	0.540896					1.32696	1.30436
2.07385	1.16904			1.49693	1.13405	1.46817	1.19532				1.3109	1.37472					1.31436	1.31009
1.98342	1.14075			1.49381	1.21211	0.841635	1.21063				1.29432	1.29677					1.29202	1.19093
2.09503	1.04121			1.93218	1.38024	1.06077	1.19856				1.29061	1.55035					1.35777	1.58881
2.5472	0.962944			1.19712	1.69867	1.04326	1.12333				1.51997	1.06804					1.15138	0.979014
1.9585	1.11461			1.14776	1.55184	0.902923	1.02562				1.30699	1.12319					1.29124	0.883169
1.71972	1.09726			1.40773	1.28978	0.786782	1.04991				1.40854	1.15321					1.1295	0.744982
1.09009	1.19258			1.52439	1.31995	1.32255	1.00972				1.37628	1.11987					1.26008	1.44923
1.84811	1.20029			1.71569	1.27245	1.35338	1.00162				1.37276	1.24993					1.32055	1.10005
2.22082	1.12793			1.93381	1.25962	1.22609	0.763426				1.42833	1.20636					1.24582	1.12128
1.80241	1.08685			1.17402	1.23622	1.20858	1.02872				1.44586	1.37351					1.24039	1.27447
1.23944	1.19973			1.75716	1.33881	1.01955	1.20351				1.33121	1.831					1.26162	1.27092
1.65661	1.29065			1.37796	1.28307	1.33226	1.16867				1.35053	1.18921					1.36859	0.974375
1.33613	1.40503					1.14678	0.85734				1.38012	1.18759					1.24513	1.53274
1.77004	1.11946					1.45938	0.704869				1.32105	1.34334					1.29869	1.25651
1.68502	1.26451					0.834312	1.19935				1.30511	1.22473					1.14574	1.61779
2.20788	0.988678					1.08442	1.23849				1.33862	1.36348					1.41688	1.64122
1.96301	1.20053					1.02528	1.02938				1.44489	1.18751					1.42013	1.42381
2.27267	1.16547					1.07937	0.957166				1.44129	1.30243					1.39367	1.43314
1.41652	1.1743					1.497	1.05232				1.37334	1.3509					1.3092	1.26942
1.75865	1.375					1.17766	1.30642				1.28223	1.54979					1.36419	1.06147
1.68865	1.40669					0.86094	1.22853				1.33901	1.13883					1.34827	1.17327
2.21193	1.3248					0.71957	1.26977				1.1287	1.61815					1.34718	1.28214
2.00118	1.35257					0.686376	1.12745				1.16098	1.57142					1.43411	1.09705
1.8268	1.2138					1.10133	1.10001				1.17479	1.58117					1.36958	1.25185
1.31759	1.50323					0.854324	0.929827				1.33271	1.56479					1.30451	0.855752
1.57171	1.38573					0.933411	0.994959				1.4272	1.47318					1.22729	1.77701
1.08401	1.52368					1.10669	0.985039				1.1955	1.41184					1.31494	1.0847
1.25489	1.46862					1.09713	0.871453				1.43781	1.17417					1.26401	1.09417
2.3352	0.613543					1.01864	1.13376				1.40084	1.31807					1.36135	0.992035
1.60588	0.980155					1.01077	1.26835				1.23304	1.25786					1.40029	1.34012
1.43367	1.15949					0.939832	1.19044				1.3725	1.00688					1.42953	0.867187
1.84671	1.29281					0.946901	1.25582				1.26587	1.00332					1.34941	1.05931
1.4195	1.03373					0.844725	1.16548				1.32522	1.313					1.27989	0.994758
2.76742	1.03188					1.19764	1.17224				1.29578	1.07433					1.26755	1.162
						1.307	1.19898				1.44657	1.08653					1.33259	0.858882
						0.907465	1.26855				1.38584	0.956522					1.25656	1.05188
						1.10587	1.3867				1.3725	2.20247					1.03746	1.20663
						1.34523	1.35579				1.19459	1.17973					1.18715	1.16597
						0.363454	1.47413				1.04626	1.30108					1.20629	1.05744
						1.0234	1.28089				0.941026	1.28654					1.21441	1.15599
						0.9484	1.34056				0.621129	1.59989					1.24004	1.07456
						0.788991	1.4195				0.829439	1.61386					1.40881	1.00201
						1.43066	1.35126				0.875465	1.57018					1.11117	1.16163
						0.946854	1.25799				1.04726	1.52332					1.17394	2.22156
						1.12772	1.32077				1.02155	1.34728					1.20632	1.27504
						0.778585	1.39331				0.930823	1.11119					1.08566	1.7511
						0.933916	1.24824				1.07753	0.986773					1.06177	1.38955
						1.18746	1.07872				0.734462	2.5894					1.09593	1.22525
						0.967688	1.37624				0.924218	2.16473					1.19734	1.29151
						0.984729	1.05011				1.01146	1.40626					1.22615	1.32841
						1.54027	0.948891				1.06486	2.11087					1.14304	1.22705
						1.75513	0.910835				1.16656	0.633396					1.06091	1.31766
						1.43252	1.12682				0.39059	2.5184					0.858002	1.25836
						1.40967	1.02153				0.832532	1.65762					0.93644	1.06052
						1.42756	1.03813				1.01113	2.65133					1.21832	1.15999
						1.21527	1.25467				1.0125	1.49193					1.16608	0.925674
						1.16692	1.25904				1.18525	0.670639					1.06464	1.22841
						0.336048	1.29341				1.21791	1.18603					1.18758	0.968006
						0.935356	1.34053				1.29535	1.52555					1.33843	1.08474
						1.1165	1.3269				1.33561	1.21012					1.33782	0.902161
						1.0948	1.29837				1.13258	1.69975					1.25289	1.38276
						1.62962	1.01064				1.29016	1.32166					1.09317	1.13739
						1.1248	1.21657				1.35877	1.12048					1.34855	1.16822
						1.08672	1.16048				1.19419	1.23405					1.45212	1.23273
						1.38522	1.16982				1.13952	0.737802					1.29395	1.09527
						1.17125	1.26671				1.18314	0.890404					1.19661	1.17848
						1.27811	1.28232				1.31913	0.905184					1.14148	1.04528
						1.37224	1.21626				1.28777	1.31964					1.18506	1.2113
						1.22831	1.28453				1.32184	1.30065					1.2326	1.38734
						1.30406	1.36975				1.39654	1.23219					1.24186	1.36982
						1.1716	1.37559				1.36279	1.36242					1.1772	1.37874
						1.04226	1.39634				1.4648	1.44303					1.12269	1.26012
						1.05509	1.40185				1.3312	0.903556					1.16624	1.08563
						1.06666	1.29424				1.38979	1.36606					1.22357	1.18682
						1.09797	1.22098				1.3849	1.55436					1.28445	1.11595
						1.1315	1.21425				1.27604	1.3757					1.28909	0.988723
						1.50315	1.14781				1.09002	1.41604					1.375	1.24982
						1.15143	1.11508				0.996705	1.59898					1.30919	1.44897
						1.08687	1.01157				0.92624	1.68836					1.34367	1.24036
						1.16423	1.15174				1.14491	1.56146					1.09136	1.00915
						1.2318	1.09004				1.17272	1.40972					1.03037	1.12822
						1.10956	1.30524				1.31318	1.3889					1.19851	1.01088
						1.30551	1.17142				1.27329	1.43311					1.16559	1.27815
						1.29434	1.32685				1.21942	1.46458					1.25718	1.26073
						1.45777	1.39884				1.211	1.98396					1.13644	1.03685
						1.32657	1.13396				1.27436	1.67753					1.1742	1.26876
						1.17375	1.12559				1.36845	1.7106					1.30885	1.25224
						1.51932	0.98232				1.24499	1.55734					1.3316	0.530146
						1.30415	1.05443				1.14204	1.92438					1.30028	0.988834
						1.32556	1.22703				1.22309	1.63612					1.27982	0.785085
						1.45655	1.30954				1.05022	1.4387					1.37564	1.16006
						1.26566	1.18337				0.967676	1.90045					1.41494	1.33937
						1.11151	1.15257				1.28181	1.47548					1.42628	1.32021
						1.07657	1.20769				1.32566	1.53139					1.19711	1.32107
						1.38286	1.18454				1.29423	1.45918					1.27639	1.26523
						1.23261	1.13305				1.38552	1.56112					1.48622	1.30219
						1.67965	0.92331										1.40197	1.2405
						1.40804	1.04056										1.27478	1.30898
						1.5904	1.07283										1.24385	1.34189
						1.4183	1.04925										1.29623	1.08125
						1.27541	1.21664										1.34881	1.00189
						1.05989	1.08853										1.32396	1.29713
						1.27224	1.13862										1.20557	1.26279
						1.40855	1.29431										1.25586	1.43553
						1.15231	1.25271										1.25303	1.28265
						1.19142	1.18376										1.27387	1.25796
						1.40587	1.19687										1.24693	1.15819
						1.00181	1.37136										1.13702	1.20101
						1.22027	1.27982										1.21717	1.33927
						1.18878	1.28895										1.25203	1.23247
						1.36516	1.0801										1.34435	1.17898
						0.895678	1.05339										1.26145	1.43991
						1.08969	1.03586										1.41148	1.23109
						1.38957	1.39876										1.4212	1.25207
						1.16628	1.35529										1.31374	1.43179
						1.13644	1.33635										1.28625	1.28809
						1.29671	1.28131										1.32523	1.04419
						1.27991	1.28999										1.28631	1.14984
						1.38335	1.30217										1.33595	1.20873
						1.74013	1.34666										1.36129	1.25914
						0.897343	1.34218										1.33051	1.27468
						1.20635	1.34974										1.30901	1.0756
						1.289	1.23892										1.36342	1.16959
						1.27287	1.2479										1.31842	1.3868
						1.25999	1.28763										1.28463	1.24039
						1.22759	1.26705										1.28382	1.33807
						1.62952	1.28828										1.36761	1.20366
						1.13483	1.31805										1.44112	1.17924
						1.29571	1.31083										1.25184	1.16768
						1.13562	1.34773										1.30137	1.26819
						1.13411	1.34288										1.26382	1.31726
						1.02731	1.20059										1.29687	1.20021
						0.669806	1.21847										1.27426	1.46889
						1.12954	1.24289										1.442	0.810309
						1.02797	1.33639										1.26893	1.62635
						1.33342	1.35441										1.29746	1.58543
						1.22914	1.33727										1.16672	1.23221
						1.1206	1.33147										1.30247	1.16316
						1.12756	1.27216										1.31661	1.6112
						1.13156	1.24524										1.32807	1.08613
						1.22148	1.2309
						1.11268	1.1663
						1.04513	1.2119
						1.29537	0.967688
						1.27906	1.08535
						1.41485	1.05823
						0.650769	1.04052
						1.9216	1.30232
						1.84532	1.04424
						1.75597	1.05345
						1.71623	1.17798
						2.7404	0.380251
						1.99006	0.887621
						1.61622	1.13089
						1.58564	1.13061
						1.75124	1.05914
						1.42396	1.06527
						1.45588	0.891681
						1.72208	0.911726
						1.77725	1.07904
						1.33253	1.17585
						1.45211	1.09459
						1.94783	1.21621
						1.44918	1.12274
						1.72976	1.25699
						1.48378	1.26952
						1.6037	1.2365
						1.43873	1.26881
						1.26632	0.982477
						0.98727	1.26988
						1.4917	1.4132
						1.19192	1.28066
						1.24245	1.26981
						1.28027	1.21003
						1.35029	1.27082
						1.33471	1.32563
						1.24968	1.31704
						1.42068	1.3393
						1.32524	1.35454
						1.31871	1.34985
						1.16615	1.16725
						1.95361	1.3259
						1.17306	1.29739
						1.25162	1.17243
						2.84969	0.34332

## Sheet: EAE vs RRI
Relationship between extinction angstrom exponent (EAE) and real refractive Index (RRI)
				Data source: AERONET (https://aeronet.gsfc.nasa.gov/cgi-bin/webtool_inv_v3)
Time: 12:00:00 pm, Location: Dhaka (23.72839, 90.39819), Bhola (22.22668, 90.75642)
Dhaka (2012-2019)									Bhola (2013-2019)
Pre-monoon		Monsoon		Post-monoon		Winter			Pre-Monsoon		Monsoon		Post-Monsoon		Winter
RRI	EAE	RRI	EAE	RRI	EAE	RRI	EAE		EAE	RRI	EAE	RRI	EAE	RRI	EAE	RRI
1.5289	1.32894	1.45455	0.725437	1.41823	1.29316	1.39285	1.25426		1.43227	1.4121	1.08801	1.5353	1.22103	1.4333	1.27765	1.56097
1.44773	1.36738	1.5286	0.628171	1.5204	1.25022	1.5077	1.37067		1.42328	1.3832	0.902424	1.48157	1.02394	1.47475	1.23302	1.54357
1.44253	1.27152	1.42233	1.0547	1.486	1.35195	1.4393	1.33806		1.4023	1.43522	0.737484	1.5012	1.2624	1.41692	1.24195	1.5805
1.47247	1.27002	1.4244	1.26228	1.4938	1.35653	1.3395	1.27431		1.31737	1.41805	0.766987	1.464	1.17058	1.46513	1.32479	1.5721
1.4556	1.29175	1.3895	1.3427	1.4351	1.36581	1.48112	1.23371		0.725227	1.4875	1.49575	1.39875	1.2488	1.42728	1.35201	1.6
1.3941	1.37071	1.4891	0.935418	1.33	1.3873	1.49265	1.15839		1.10491	1.50745			1.24754	1.4139	1.25488	1.44785
1.5803	0.413319	1.3605	1.03953	1.4988	1.13293	1.525	1.16546		1.24104	1.52026			1.30285	1.376	1.04753	1.46408
1.4534	1.35052	1.39154	0.864423	1.4168	1.22179	1.5085	1.06436		1.26076	1.5314			1.5353	1.45056	1.08909	1.46513
1.4354	0.951595	1.4288	1.0985	1.4848	1.29155	1.51208	1.1954		1.22512	1.4923			1.49814	1.41379	1.23857	1.47742
1.40035	1.05816	1.3485	1.23361	1.4846	1.3342	1.4894	1.23432		1.24003	1.49435			1.40859	1.41862	1.02507	1.45287
1.42715	1.21079	1.4465	1.04491	1.5584	1.30868	1.41217	1.2203		1.36833	1.42625			1.38245	1.38475	1.28006	1.41525
1.51095	1.46087	1.4027	1.1405	1.547	1.33012	1.42117	1.18192		1.21138	1.53252			1.30811	1.4436	1.34025	1.41417
1.40583	0.965634	1.4474	1.04697	1.5161	1.25292	1.44668	1.1572		1.1782	1.5309			1.42442	1.38452	0.975415	1.47663
1.36234	0.793181	1.33	1.07788	1.52375	1.2257	1.39116	1.35013		0.968004	1.47175			1.35169	1.5228	1.19434	1.53129
1.5462	1.24768	1.5248	1.13705	1.5216	1.28728	1.368	1.21894		0.96175	1.45663			1.36368	1.46469	0.923247	1.43753
1.41575	1.02987	1.33	1.4684	1.4649	1.20906	1.4351	0.868758		0.961042	1.4457			1.294	1.42797	1.06294	1.47648
1.4079	1.10908	1.4053	1.29757	1.3785	1.08914	1.4222	0.870833		0.856203	1.3605			1.63036	1.46208	1.13358	1.48168
1.3775	1.16593			1.368	1.4254	1.4123	1.04596		1.39025	1.59985			1.36973	1.47851	1.22905	1.46768
1.3579	0.933844			1.45217	1.37454	1.4215	0.918962		1.30846	1.55783			1.33532	1.48982	1.23511	1.48137
1.34278	0.730709			1.4173	1.34584	1.42632	1.16797		1.29215	1.6			1.31106	1.46545	1.22653	1.47404
1.37335	1.01437			1.4521	1.43069	1.46477	1.01875		1.4866	1.5508			1.33668	1.37937	0.972171	1.4263
1.38415	1.48532			1.49575	1.46073	1.50927	1.09922		0.703316	1.4839			1.35926	1.44273	1.18586	1.51174
1.36864	1.47694			1.49435	1.42842	1.46036	1.21854		1.07969	1.4803			1.33167	1.45033	1.32099	1.43007
1.3987	1.32055			1.44562	1.4522	1.4614	1.24262		0.962312	1.50865			1.17688	1.47449	1.42742	1.46906
1.38902	1.41968			1.4553	1.44389	1.46627	1.13279		1.05261	1.4818			1.3428	1.4706	1.29656	1.4772
1.36523	1.27902			1.5007	1.29363	1.4414	1.31205		1.38694	1.45435			1.21981	1.4549	1.21799	1.4438
1.4054	0.958498			1.4885	1.15784	1.4735	0.825736		0.667173	1.3765			1.15711	1.4439	1.48078	1.491
1.4183	0.997156			1.5071	1.08184	1.52265	0.943589		1.34203	1.44842			1.23803	1.51325	1.03064	1.39053
1.4439	0.880734			1.55553	1.22759	1.43825	0.822596		1.29291	1.4383			1.41448	1.46355	1.21367	1.5283
1.4262	1.05512			1.478	1.23913	1.46797	1.3937		1.39275	1.41807			1.34989	1.43078	1.23972	1.4112
1.3991	1.11329			1.48055	1.26037	1.5013	1.01147		1.24883	1.4797			1.42811	1.39006	1.31226	1.47347
1.4617	1.37526			1.5089	1.17128	1.48172	1.28692		1.57072	1.4391			1.28051	1.4876	1.17079	1.4089
1.4341	1.27425			1.49573	1.16997	1.6	0.413252		1.39035	1.4487			1.3762	1.4614	1.1875	1.46818
1.52774	1.15037			1.4294	1.25106	1.47802	1.31789		1.56854	1.44505			1.25991	1.4106	1.3176	1.4042
1.50295	1.14326			1.499	1.27274	1.48542	1.3052		1.29964	1.4617			1.32014	1.46107	1.32999	1.44633
1.4146	1.22509			1.46705	1.27592	1.49796	1.33144		1.50878	1.4907			1.13804	1.51078	1.30158	1.4048
1.424	1.28364			1.4644	1.29696	1.45563	1.31803		1.5132	1.4673			1.21627	1.4753	1.23186	1.4538
1.4522	1.18288			1.5171	1.22503	1.4924	0.976147		1.33254	1.44242			1.23954	1.48795	1.35295	1.4313
1.40996	0.878091			1.5127	1.25169	1.45165	1.04734		1.22477	1.40763			1.22736	1.4664	1.34956	1.4257
1.4661	0.946051			1.46928	1.17312	1.47215	0.897749		1.41263	1.4012			1.35511	1.3887	1.30295	1.44605
1.4238	1.04321			1.49808	1.28446	1.50398	1.17954		1.11557	1.48185			1.43146	1.3971	1.40841	1.4613
1.3748	1.19335			1.53375	1.1829	1.4824	1.08427		1.11487	1.42955			1.41556	1.46257	1.18726	1.44998
1.4146	1.10778			1.42695	1.21454	1.4361	0.94371		1.20208	1.5579			1.51996	1.37865	0.943672	1.44165
1.47365	1.31093			1.41525	1.30956	1.42225	1.1604		1.14099	1.49677			1.53811	1.475	1.17819	1.4902
1.4847	0.381985			1.41445	1.41871	1.45677	1.10953		1.17356	1.49843			1.34812	1.45965	1.27556	1.4683
1.46885	0.989117			1.4773	1.3591	1.48504	1.44486		1.38921	1.49192			1.3814	1.44263	1.28057	1.4515
1.3396	1.03686			1.406	1.22811	1.54737	1.42431		1.32025	1.4261			1.17809	1.4578	1.31623	1.42926
1.33	1.01778			1.3756	1.39512	1.50233	1.26894		1.22108	1.3849			1.28308	1.42995	1.27982	1.45425
1.51755	1.09424			1.40617	1.41378	1.49363	1.37383		1.25332	1.4059			1.28287	1.42425	1.27272	1.429
1.4502	1.18381			1.4162	1.37759	1.57113	0.399129		1.11679	1.49595			1.51515	1.4349	1.41169	1.42794
1.50975	1.25261			1.4085	1.33187	1.36685	1.26264		0.894956	1.3797			1.15507	1.5081	1.48991	1.37843
1.3892	1.21387			1.4805	1.46108	1.52287	1.06559		0.85516	1.4388			1.24616	1.52008	1.42081	1.3389
1.3493	0.990814			1.4436	1.40235	1.45182	1.22363		1.34609	1.4317			1.40161	1.44262	1.32119	1.38333
1.5158	1.16706			1.4263	1.24561	1.48853	1.27894		1.30178	1.41653			1.30729	1.43634	1.2626	1.44735
1.535	1.30283			1.50123	1.26762	1.48513	1.19486		1.42255	1.3845			1.31965	1.49611	1.17513	1.45596
1.3928	0.927536			1.3967	1.26891	1.47375	1.14882		1.30378	1.415			1.30316	1.46947	1.32455	1.41917
1.4501	1.35156			1.49367	1.27884	1.4522	1.2128		1.15418	1.4085			1.2983	1.41027	1.48639	1.3699
1.44188	0.953076			1.439	1.35276	1.4773	1.23702		1.16954	1.37845			1.28171	1.45572	1.42797	1.42305
1.4648	1.02948			1.45843	1.54317	1.4843	1.22071		1.50006	1.47645			1.18436	1.40395	1.30587	1.42713
1.3733	1.4169			1.3815	1.53663	1.3523	1.34556		1.33823	1.5061			1.27949	1.43617	1.30551	1.44777
1.3924	0.947129			1.4519	1.31096	1.46795	1.21953		1.45257	1.41892			1.30691	1.4277	1.32278	1.4123
1.3616	1.1133			1.483	1.2308	1.419	1.36566		1.56738	1.3478			1.42644	1.48555	1.22963	1.42515
1.4268	1.1623			1.48677	1.23032	1.46527	1.29121		0.845543	1.4816			1.46022	1.4989	1.28399	1.41958
1.5092	1.11944			1.4324	1.22788	1.49133	1.2603		0.957634	1.5025					1.38952	1.4238
1.4497	1.1696			1.4515	1.2322	1.48023	1.1988		0.696235	1.4816					1.27387	1.40717
1.4589	1.14163			1.4954	1.22877	1.49425	1.07848		1.25263	1.5426					1.26795	1.42081
1.44535	1.07253			1.48123	1.19108	1.45177	1.13149		1.25409	1.48018					1.23735	1.4464
1.37043	1.33385			1.4855	1.25205	1.4834	1.12979		1.4003	1.4858					1.28168	1.42453
1.43525	1.34462			1.4716	1.06972	1.44336	1.09881		1.48651	1.3897					1.42235	1.47183
1.4209	1.33893			1.49327	1.18674	1.4511	1.07159		1.57254	1.42895					1.32967	1.49548
1.45686	1.21712			1.48095	1.03262	1.47208	1.09297		1.55582	1.4313					1.33076	1.4215
1.48318	1.41173			1.48325	1.30815	1.46457	1.13949		1.33374	1.4919					1.35322	1.4115
1.3435	1.30162			1.44873	1.23737	1.51727	1.23263		1.29513	1.5126					1.25971	1.5568
1.33	1.26223			1.5394	1.29249	1.3905	1.29605		1.24816	1.55227					1.14389	1.52093
1.5326	1.1761			1.4737	1.41902	1.4308	1.38571		1.29117	1.5018					1.11181	1.4691
1.55852	1.22199			1.4239	1.33065	1.33	1.43313		1.30099	1.54412					1.06798	1.4785
1.45578	1.43585			1.41487	1.27664	1.33	1.38363		1.14388	1.49838					0.884881	1.4906
1.36035	1.42332			1.4213	0.923489	1.4309	1.60119		1.51362	1.456					1.18211	1.516
1.43837	1.33039			1.4772	1.51958	1.3954	1.32028		0.957091	1.52448					1.43142	1.5633
1.37373	1.41002			1.466	1.31742	1.44104	1.3605		1.20364	1.49904					1.35797	1.5898
1.35973	1.26514			1.44075	1.35567	1.41908	1.30318		1.27895	1.4411					1.47302	1.5818
1.52705	1.21098			1.5273	1.27551	1.46266	1.18923		1.11634	1.54204					1.41526	1.5613
1.3674	1.34225			1.49437	1.32373	1.4435	1.06674		1.1473	1.4958					1.40502	1.5348
1.44413	1.40626			1.56625	1.16494	1.438	0.794218		1.16491	1.44695					1.15541	1.5594
1.43643	1.3755			1.52527	1.12794	1.3768	0.945333		1.0596	1.4429					1.20841	1.6
1.4694	1.40043			1.5505	1.22034	1.43915	1.005		1.2165	1.5004					1.26715	1.55225
1.3872	1.20628			1.56128	1.34087	1.40284	1.21859		1.2344	1.4122					1.43212	1.55185
1.3871	1.22098			1.52524	1.23524	1.4355	1.19583		0.899048	1.46307					1.45218	1.44155
1.4202	1.30479			1.4517	1.32231	1.4037	1.23428		1.02513	1.47202					1.32156	1.6
1.55615	0.941141			1.5837	1.35691	1.40505	1.01143		0.930627	1.48493					1.21881	1.52632
1.5257	1.07754			1.35783	1.35268	1.497	1.27988		0.972479	1.5236					1.29499	1.48036
1.45578	1.26305			1.4271	1.37442	1.4263	1.3108		1.1661	1.53767					1.25135	1.52772
1.4312	1.31705			1.51845	1.19377	1.4373	0.828407		1.27921	1.52953					1.15475	1.48618
1.4578	1.27979			1.54764	0.340546	1.46785	0.967917		1.1057	1.4629					1.23106	1.46378
1.43667	1.17596			1.53513	1.37366	1.3915	1.00433		1.11797	1.47965					1.11038	1.50723
1.43777	1.29154			1.52937	1.25944	1.52475	1.02833		0.874904	1.5152					1.21667	1.4418
1.4307	1.34659			1.55795	1.31778	1.5594	1.0558		1.11306	1.4731					1.14217	1.4866
1.4185	1.2931			1.48365	1.45039	1.57525	1.12371		1.24528	1.47796					1.29571	1.5524
1.48277	1.13434			1.49062	1.35926	1.5672	1.05458		1.19571	1.48018					1.31424	1.46135
1.41382	0.733208			1.50527	1.33502	1.5676	0.995151		1.21845	1.46413					1.23004	1.46126
1.49953	0.913657			1.5507	1.34042	1.5302	0.962264		1.03438	1.4995					1.15772	1.48988
1.49386	1.05688			1.4717	1.33179	1.48185	1.19422		1.20509	1.4821					1.27564	1.4425
1.49676	1.21958			1.4546	1.2631	1.47357	1.19898		0.923005	1.4683					1.26158	1.47011
1.4525	1.33147			1.52005	1.14768	1.46275	1.16065		0.959372	1.4539					1.22943	1.46545
1.41148	1.212			1.4001	1.21137	1.4412	1.25974		1.24873	1.4649					1.21961	1.4638
1.3686	1.08455			1.3684	1.3985	1.54445	1.17746		1.29637	1.4217					1.32219	1.45187
1.43823	1.28781			1.4699	1.21044	1.48315	0.35822		1.03548	1.47535					0.992644	1.44257
1.41043	1.16693			1.40615	1.21107	1.41077	1.01141		1.21939	1.49903					0.771071	1.465
1.39882	0.975457			1.33	1.41833	1.39475	1.2728		1.33779	1.4618					1.06235	1.49072
1.45985	1.17472			1.5102	1.34341	1.3322	1.25248		1.1853	1.4694					1.11349	1.42095
1.46542	1.08485			1.4803	1.47079	1.5209	1.266		1.09532	1.3549					1.21284	1.48438
1.44765	0.724539			1.45165	1.49802	1.4088	1.1379		0.895594	1.4246					1.20939	1.468
1.33	1.02431			1.49014	1.3453	1.368	1.37478		1.05383	1.3996					1.131	1.47703
1.4584	1.2289			1.36437	1.34469	1.3798	1.32087		1.00894	1.3955					1.1351	1.4222
1.43437	0.845677			1.41338	1.31953	1.414	1.44831		1.03378	1.44155					1.21362	1.4126
1.4005	1.46379			1.40206	1.31636	1.41975	1.40224		1.07659	1.47047					1.20078	1.5011
1.4451	0.736474			1.4698	1.30858	1.4762	1.33337		1.16972	1.47263					1.13811	1.49906
1.48915	0.573584			1.45971	1.31579	1.5168	1.21139		1.04027	1.44697					1.27857	1.50487
1.5354	0.768261			1.3836	1.34187	1.50467	1.3401		1.02603	1.5086					1.32696	1.45729
1.4376	0.877721			1.4828	1.26408	1.474	1.10976		1.20131	1.4325					1.31436	1.48094
1.4673	1.16904			1.43657	1.13405	1.4824	1.19532		1.3109	1.45932					1.29202	1.44215
1.4454	1.14075			1.46606	1.21211	1.46217	1.21063		1.29432	1.47886					1.35777	1.40975
1.46095	1.04121			1.391	1.38024	1.43627	1.19856		1.29061	1.46958					1.15138	1.4876
1.4261	0.962944			1.4517	1.69867	1.45457	1.12333		1.51997	1.4523					1.29124	1.48562
1.48965	1.11461			1.3879	1.55184	1.44926	1.02562		1.30699	1.52586					1.1295	1.4427
1.5048	1.09726			1.4759	1.28978	1.41874	1.04991		1.40854	1.48676					1.26008	1.46
1.5262	1.19258			1.4273	1.31995	1.4264	1.00972		1.37628	1.47222					1.32055	1.4482
1.49905	1.20029			1.5438	1.27245	1.39843	1.00162		1.37276	1.483					1.24582	1.45998
1.5276	1.12793			1.5225	1.25962	1.41595	0.763426		1.42833	1.5011					1.24039	1.44747
1.51735	1.08685			1.5597	1.23622	1.42992	1.02872		1.44586	1.4934					1.26162	1.42629
1.503	1.19973			1.5277	1.33881	1.4562	1.20351		1.33121	1.4601					1.36859	1.4376
1.42815	1.29065			1.4822	1.28307	1.43207	1.16867		1.35053	1.451					1.24513	1.4254
1.4502	1.40503					1.41985	0.85734		1.38012	1.42573					1.29869	1.45895
1.36832	1.11946					1.4018	0.704869		1.32105	1.43998					1.14574	1.3935
1.47402	1.26451					1.4301	1.19935		1.30511	1.51506					1.41688	1.4311
1.4341	0.988678					1.43685	1.23849		1.33862	1.48726					1.42013	1.39635
1.5158	1.20053					1.42298	1.02938		1.44489	1.46384					1.39367	1.46245
1.34875	1.16547					1.45463	0.957166		1.44129	1.43342					1.3092	1.49483
1.4372	1.1743					1.42965	1.05232		1.37334	1.41778					1.36419	1.4257
1.47867	1.375					1.4054	1.30642		1.28223	1.41795					1.34827	1.4569
1.45903	1.40669					1.4283	1.22853		1.33901	1.4137					1.34718	1.42837
1.4975	1.3248					1.4485	1.26977		1.1287	1.4459					1.43411	1.44076
1.4696	1.35257					1.47037	1.12745		1.16098	1.4823					1.36958	1.4515
1.3672	1.2138					1.5203	1.10001		1.17479	1.4853					1.30451	1.50772
1.481	1.50323					1.5294	0.929827		1.33271	1.4985					1.22729	1.44627
1.4887	1.38573					1.4679	0.994959		1.4272	1.50663					1.31494	1.45142
1.45475	1.52368					1.52035	0.985039		1.1955	1.55124					1.26401	1.47505
1.4702	1.46862					1.44527	0.871453		1.43781	1.4643					1.36135	1.48725
1.4286	0.613543					1.45533	1.13376		1.40084	1.4462					1.40029	1.45303
1.4059	0.980155					1.45622	1.26835		1.23304	1.4171					1.42953	1.47005
1.44265	1.15949					1.48507	1.19044		1.3725	1.46198					1.34941	1.47237
1.4473	1.29281					1.44568	1.25582		1.26587	1.3741					1.27989	1.47542
1.492	1.03373					1.4979	1.16548		1.32522	1.4214					1.26755	1.4966
1.4574	1.03188					1.50588	1.17224		1.29578	1.47876					1.33259	1.44992
						1.4378	1.19898		1.44657	1.43372					1.25656	1.4851
						1.43207	1.26855		1.38584	1.46847					1.03746	1.53342
						1.3491	1.3867		1.3725	1.4349					1.18715	1.52165
						1.40225	1.35579		1.19459	1.4542					1.20629	1.53333
						1.5346	1.47413		1.04626	1.49823					1.21441	1.5168
						1.41846	1.28089		0.941026	1.5076					1.24004	1.55416
						1.39748	1.34056		0.400113	1.59095					1.40881	1.51905
						1.4192	1.4195		0.829439	1.4282					1.11117	1.5264
						1.3437	1.35126		0.875465	1.50893					1.17394	1.4507
						1.4635	1.25799		1.04726	1.47657					1.20632	1.46205
						1.41245	1.32077		1.02155	1.52612					1.08566	1.4965
						1.44198	1.39331		0.930823	1.4848					1.06177	1.48293
						1.43505	1.24824		1.07753	1.5413					1.09593	1.48917
						1.4699	1.07872		0.734462	1.46					1.19734	1.5628
						1.4068	1.37624		0.924218	1.4921					1.22615	1.46535
						1.47732	1.05011		1.01146	1.4495					1.14304	1.51715
						1.47395	0.948891		1.06486	1.4755					1.06091	1.47973
						1.4766	0.910835		1.16656	1.4265					0.858002	1.4449
						1.47455	1.12682		0.39059	1.4645					0.93644	1.4297
						1.4082	1.02153		0.832532	1.4601					1.21832	1.45947
						1.4344	1.03813		1.01113	1.43255					1.16608	1.521
						1.43892	1.25467		1.0125	1.4574					1.06464	1.44343
						1.5249	1.25904		1.18525	1.4939					1.18758	1.50057
						1.4701	1.29341		1.21791	1.4685					1.33843	1.516
						1.4439	1.34053		1.29535	1.4782					1.33782	1.48107
						1.48573	1.3269		1.33561	1.52055					1.25289	1.45715
						1.46842	1.29837		1.13258	1.4482					1.09317	1.45837
						1.4785	1.01064		1.29016	1.4941					1.34855	1.49443
						1.46825	1.21657		1.35877	1.42797					1.45212	1.44203
						1.52163	1.16048		1.19419	1.52337					1.29395	1.52138
						1.50516	1.16982		1.13952	1.3887					1.19661	1.47163
						1.49833	1.26671		1.18314	1.46473					1.14148	1.5592
						1.4608	1.28232		1.31913	1.42633					1.18506	1.51232
						1.5085	1.21626		1.28777	1.47195					1.2326	1.44558
						1.44245	1.28453		1.32184	1.49788					1.24186	1.50665
						1.48715	1.36975		1.39654	1.46426					1.1772	1.51806
						1.46936	1.37559		1.36279	1.46726					1.12269	1.4834
						1.43236	1.39634		1.4648	1.44805					1.16624	1.48924
						1.4263	1.40185		1.3312	1.4011					1.22357	1.50043
						1.44589	1.29424		1.38979	1.4207					1.28445	1.46966
						1.47257	1.22098		1.3849	1.3936					1.28909	1.33
						1.4383	1.21425		1.27604	1.4444					1.375	1.46238
						1.45265	1.14781		1.09002	1.53784					1.30919	1.403
						1.44522	1.11508		0.996705	1.45173					1.34367	1.50495
						1.46133	1.01157		0.92624	1.50198					1.09136	1.52483
						1.46585	1.15174		1.14491	1.53342					1.03037	1.52952
						1.48362	1.09004		1.17272	1.49202					1.19851	1.53645
						1.3985	1.30524		1.31318	1.42836					1.16559	1.50915
						1.43277	1.17142		1.27329	1.48244					1.25718	1.44573
						1.42947	1.32685		1.21942	1.40615					1.13644	1.4959
						1.39977	1.39884		1.211	1.44538					1.1742	1.5044
						1.4537	1.13396		1.27436	1.42877					1.30885	1.52598
						1.4674	1.12559		1.36845	1.3542					1.3316	1.5044
						1.44313	0.98232		1.24499	1.4526					1.30028	1.49572
						1.47002	1.05443		1.14204	1.4242					1.27982	1.48243
						1.48155	1.22703		1.22309	1.45833					1.37564	1.4657
						1.46683	1.30954		1.05022	1.48959					1.41494	1.42827
						1.48062	1.18337		0.967676	1.43725					1.42628	1.44233
						1.51025	1.15257		1.28181	1.39853					1.19711	1.49145
						1.43353	1.20769		1.32566	1.4342					1.27639	1.3853
						1.475	1.18454		1.29423	1.47747					1.48622	1.41748
						1.52298	1.13305		1.38552	1.473					1.40197	1.44261
						1.4953	0.92331								1.27478	1.46578
						1.43305	1.04056								1.24385	1.46407
						1.42093	1.07283								1.29623	1.47684
						1.41477	1.04925								1.34881	1.4844
						1.49416	1.21664								1.32396	1.4826
						1.41243	1.08853								1.20557	1.48454
						1.5612	1.13862								1.25586	1.50135
						1.44555	1.29431								1.25303	1.46097
						1.4203	1.25271								1.27387	1.45918
						1.4446	1.18376								1.24693	1.43205
						1.407	1.19687								1.13702	1.48843
						1.43345	1.37136								1.21717	1.43835
						1.44047	1.27982								1.25203	1.3864
						1.47212	1.28895								1.34435	1.43883
						1.474	1.0801								1.26145	1.46373
						1.47052	1.05339								1.41148	1.46142
						1.43723	1.03586								1.4212	1.4215
						1.5274	1.39876								1.31374	1.393
						1.5148	1.35529								1.28625	1.41255
						1.4699	1.33635								1.32523	1.47472
						1.47647	1.28131								1.28631	1.4903
						1.52515	1.28999								1.33595	1.43595
						1.52405	1.30217								1.36129	1.39413
						1.56147	1.34666								1.33051	1.42991
						1.5452	1.34218								1.30901	1.48317
						1.53356	1.34974								1.36342	1.47254
						1.5506	1.23892								1.31842	1.43764
						1.52788	1.2479								1.28463	1.4619
						1.47673	1.28763								1.28382	1.44456
						1.48225	1.26705								1.36761	1.45599
						1.5309	1.28828								1.44112	1.46772
						1.50166	1.31805								1.25184	1.4455
						1.51392	1.31083								1.30137	1.47045
						1.51813	1.34773								1.26382	1.41433
						1.45718	1.34288								1.29687	1.44557
						1.5565	1.20059								1.27426	1.46903
						1.5735	1.21847								1.442	1.387
						1.5444	1.24289								1.26893	1.44433
						1.52715	1.33639								1.29746	1.45918
						1.53405	1.35441								1.16672	1.45075
						1.48565	1.33727								1.30247	1.41273
						1.4943	1.33147								1.31661	1.4551
						1.5179	1.27216								1.32807	1.42968
						1.55175	1.24524
						1.53245	1.2309
						1.58245	0.416631
						1.5187	1.2119
						1.5683	0.967688
						1.5093	1.08535
						1.5127	1.05823
						1.3792	1.04052
						1.46404	1.30232
						1.42786	1.04424
						1.45987	1.05345
						1.42023	1.17798
						1.5058	0.980251
						1.4362	0.887621
						1.5036	1.13089
						1.44497	1.13061
						1.46368	1.05914
						1.4403	1.06527
						1.45375	0.891681
						1.4482	0.911726
						1.46008	1.07904
						1.47952	1.17585
						1.4947	1.09459
						1.4786	1.21621
						1.4536	1.12274
						1.41817	1.25699
						1.47712	1.26952
						1.4813	1.2365
						1.54573	1.26881
						1.48305	0.982477
						1.5508	1.26988
						1.41137	1.4132
						1.5182	1.28066
						1.5167	1.26981
						1.4875	1.21003
						1.50527	1.27082
						1.4862	1.32563
						1.51855	1.31704
						1.48724	1.3393
						1.47618	1.35454
						1.49583	1.34985
						1.5023	1.16725
						1.41885	1.3259
						1.5397	1.29739
						1.45336	1.17243
						1.4976	1.14332

## Sheet: EAE vs SSA
Relationship between extinction angstrom exponent (EAE) and single scattering albedo (SSA)
				Data source: AERONET (https://aeronet.gsfc.nasa.gov/cgi-bin/webtool_inv_v3)
Time: 12:00:00 pm, Location: Dhaka (23.72839, 90.39819), Bhola (22.22668, 90.75642)
Dhaka (2012-2019)									Bhola (2013-2019)
Pre-monsoon		Monsoon		Post-monsoon		Winter			Pre-monsoon		Monsoon		Post-monsoon		Winter
SSA	EAE	SSA	EAE	SSA	EAE	SSA	EAE		EAE	SSA	EAE	SSA	EAE	SSA	EAE	SSA
0.8798	1.32894	0.92545	0.725437	0.844533	1.29316	0.81125	1.25426		1.43227	0.940667	1.08801	0.90465	1.22103	0.9748	1.38135	0.7904
0.877933	1.36738	0.8977	0.628171	0.8173	1.25022	0.8685	1.37067		1.42328	0.9373	0.902424	0.9406	1.02394	0.96355	1.27765	0.917667
0.860967	1.27152	0.930133	1.0547	0.850567	1.35195	0.86875	1.33806		1.4023	0.9365	0.737484	0.9337	1.2624	0.969075	1.23302	0.881967
0.853033	1.27002	0.9673	0.362275	0.8612	1.35653	0.906967	1.27431		1.31737	0.9644	0.766987	0.9381	1.17058	0.908986	1.24195	0.8816
0.88315	1.29175	0.9653	1.3427	0.80105	1.36581	0.90332	1.23371		0.725227	0.9607	1.49575	0.97635	1.2488	0.907138	1.32479	0.88385
0.9015	1.37071	0.943	0.935418	0.8404	1.3873	0.8943	1.15839		1.10491	0.9195			1.24754	0.9248	1.35201	0.8304
0.9014	1.21332	0.9254	1.03953	0.85845	1.13293	0.91395	1.16546		1.24104	0.889586			1.30285	0.974225	1.25488	0.922575
0.9138	1.35052	0.903	0.864423	0.837575	1.22179	0.8522	1.06436		1.26076	0.89785			1.5353	0.95274	1.04753	0.94365
0.8508	0.951595	0.96	0.398503	0.8406	1.29155	0.9068	1.1954		1.22512	0.9305			1.49814	0.948725	1.08909	0.919967
0.83265	1.05816	0.9607	0.383361	0.834	1.3342	0.8804	1.23432		1.24003	0.89675			1.40859	0.92274	1.23857	0.8857
0.83645	1.21079	0.91155	1.04491	0.8358	1.30868	0.919417	1.2203		1.36833	0.920475			1.38245	0.923425	1.02507	0.92555
0.9419	1.46087	0.8932	1.1405	0.8744	1.33012	0.902667	1.18192		1.21138	0.897875			1.30811	0.924075	1.28006	0.95825
0.9178	0.965634	0.9301	1.04697	0.8202	1.25292	0.93142	1.1572		1.1782	0.9049			1.42442	0.93052	1.34025	0.956233
0.89512	0.793181	0.9356	1.07788	0.83265	1.2257	0.91872	1.35013		0.968004	0.9076			1.35169	0.9095	0.975415	0.918671
0.9124	1.24768	0.9414	1.13705	0.81855	1.28728	0.9196	1.21894		0.96175	0.911267			1.36368	0.916838	1.19434	0.905171
0.89425	1.02987	0.9047	1.4684	0.844433	1.20906	0.933	0.868758		0.961042	0.9388			1.294	0.90875	0.923247	0.9154
0.8988	1.10908	0.956	0.372976	0.9631	1.08914	0.942925	0.870833		0.856203	0.92415			1.63036	0.904475	1.06294	0.90044
0.8918	1.16593			0.9426	1.4254	0.902833	1.04596		1.39025	0.89805			1.36973	0.929712	1.13358	0.89648
0.9057	0.933844			0.877625	1.37454	0.9362	0.918962		1.30846	0.856267			1.33532	0.893875	1.22905	0.9199
0.887475	0.730709			0.92435	1.34584	0.93496	1.16797		1.29215	0.8516			1.31106	0.9141	1.23511	0.909517
0.91125	1.01437			0.8967	1.43069	0.854833	1.01875		1.4866	0.8698			1.33668	0.8878	1.22653	0.9291
0.881225	1.48532			0.851125	1.46073	0.892167	1.09922		0.703316	0.9446			1.35926	0.886143	0.972171	0.9326
0.91752	1.47694			0.83255	1.42842	0.880643	1.21854		1.07969	0.9155			1.33167	0.886186	1.18586	0.881986
0.9056	1.32055			0.850325	1.4522	0.869475	1.24262		0.962312	0.9156			1.17688	0.913456	1.32099	0.867329
0.96358	0.4077			0.879933	1.44389	0.907325	1.13279		1.05261	0.9482			1.3428	0.9182	1.42742	0.890057
0.927633	1.27902			0.8574	1.29363	0.88995	1.31205		1.38694	0.95885			1.21981	0.9469	1.29656	0.8977
0.92545	0.958498			0.92015	1.15784	0.9	0.825736		0.667173	0.9291			1.15711	0.9205	1.21799	0.8924
0.9208	0.997156			0.8845	1.08184	0.8876	0.943589		1.34203	0.92228			1.23803	0.87065	1.48078	0.87065
0.8552	0.880734			0.877733	1.22759	0.9108	0.822596		1.29291	0.918875			1.41448	0.84205	1.03064	0.838167
0.9031	1.05512			0.88155	1.23913	0.883867	1.3937		1.39275	0.9261			1.34989	0.86056	1.21367	0.8614
0.9271	1.11329			0.88095	1.26037	0.87615	1.01147		1.24883	0.93475			1.42811	0.8746	1.23972	0.85495
0.93108	1.37526			0.9065	1.17128	0.882725	1.28692		1.57072	0.94			1.28051	0.8598	1.31226	0.850367
0.9132	1.27425			0.873033	1.16997	0.8477	1.31325		1.39035	0.929475			1.3762	0.908833	1.17079	0.8567
0.872786	1.15037			0.8672	1.25106	0.857025	1.31789		1.56854	0.93025			1.25991	0.87126	1.1875	0.8984
0.89455	1.14326			0.893	1.27274	0.86545	1.3052		1.29964	0.901571			1.32014	0.855371	1.3176	0.879625
0.8425	1.22509			0.90005	1.27592	0.84474	1.33144		1.50878	0.90132			1.13804	0.89548	1.32999	0.8795
0.911333	1.28364			0.8688	1.29696	0.8654	1.31803		1.5132	0.9115			1.21627	0.883675	1.30158	0.888375
0.94145	1.18288			0.8716	1.22503	0.8619	0.976147		1.33254	0.9291			1.23954	0.84265	1.23186	0.9151
0.84916	0.878091			0.87175	1.25169	0.912	1.04734		1.22477	0.916733			1.22736	0.86066	1.35295	0.899767
0.8368	0.946051			0.888917	1.17312	0.9183	0.897749		1.41263	0.954367			1.35511	0.826	1.34956	0.9042
0.8688	1.04321			0.882025	1.28446	0.90425	1.17954		1.11557	0.9352			1.43146	0.8597	1.30295	0.90115
0.9124	1.19335			0.864	1.1829	0.912825	1.08427		1.11487	0.92735			1.41556	0.870475	1.40841	0.91105
0.9076	1.10778			0.9383	1.21454	0.8956	0.94371		1.20208	0.933			1.51996	0.8262	1.18726	0.896925
0.89825	1.31093			0.9213	1.30956	0.864075	1.1604		1.14099	0.870325			1.53811	0.872467	0.943672	0.90495
0.8866	1.19855			0.9514	1.41871	0.870533	1.10953		1.17356	0.856314			1.34812	0.884425	1.17819	0.9297
0.885975	0.989117			0.9203	1.3591	0.86148	1.44486		1.38921	0.89856			1.3814	0.876433	1.27556	0.911967
0.92025	1.03686			0.93625	1.22811	0.883667	1.42431		1.32025	0.9577			1.17809	0.904	1.28057	0.90975
0.9113	1.01778			0.92965	1.39512	0.876433	1.26894		1.22108	0.9167			1.28308	0.89175	1.31623	0.89508
0.8846	1.09424			0.914867	1.41378	0.841267	1.37383		1.25332	0.8989			1.28287	0.89515	1.27982	0.88305
0.9171	1.18381			0.916833	1.37759	0.885033	0.991287		1.11679	0.9125			1.51515	0.86705	1.27272	0.90958
0.91935	1.25261			0.868	1.33187	0.83475	1.26264		0.894956	0.92585			1.15507	0.902833	1.41169	0.887457
0.8807	1.21387			0.8071	1.46108	0.876533	1.06559		0.85516	0.9095			1.24616	0.90198	1.48991	0.89285
0.8857	0.990814			0.840233	1.40235	0.85252	1.22363		1.34609	0.945133			1.40161	0.92912	1.42081	0.8514
0.9079	1.16706			0.8381	1.24561	0.83815	1.27894		1.30178	0.934433			1.30729	0.9211	1.32119	0.863867
0.9295	1.30283			0.876375	1.26762	0.8886	1.19486		1.42255	0.9589			1.31965	0.902043	1.2626	0.866117
0.8674	0.927536			0.96025	1.26891	0.8948	1.14882		1.30378	0.9384			1.30316	0.897533	1.17513	0.890925
0.9138	1.35156			0.902367	1.27884	0.88895	1.2128		1.15418	0.9811			1.2983	0.9013	1.32455	0.868683
0.88002	0.953076			0.8995	1.35276	0.882375	1.23702		1.16954	0.9742			1.28171	0.888767	1.48639	0.888325
0.9148	1.02948			0.889475	1.54317	0.8863	1.22071		1.50006	0.9525			1.18436	0.9047	1.42797	0.876683
0.9263	1.4169			0.9392	1.53663	0.8743	1.34556		1.33823	0.9924			1.27949	0.893825	1.30587	0.896
0.9195	0.947129			0.90145	1.31096	0.909225	1.21953		1.45257	0.96748			1.30691	0.906275	1.30551	0.8897
0.9368	1.1133			0.9079	1.2308	0.92055	1.36566		1.56738	0.9778			1.42644	0.8853	1.32278	0.9027
0.9534	1.1623			0.873586	1.23032	0.909117	1.29121		0.845543	0.9701			1.46022	0.90075	1.22963	0.915925
0.948267	1.11944			0.86865	1.22788	0.909175	1.2603		0.957634	0.9523					1.28399	0.911875
0.95	1.1696			0.8839	1.2322	0.8909	1.1988		0.696235	0.9637					1.38952	0.86885
0.9522	1.14163			0.827633	1.22877	0.887725	1.07848		1.25263	0.85164					1.27387	0.867143
0.95325	1.07253			0.8274	1.19108	0.915967	1.13149		1.25409	0.8835					1.26795	0.893071
0.900175	1.33385			0.8218	1.25205	0.89935	1.12979		1.4003	0.9033					1.23735	0.915775
0.8982	1.34462			0.8908	1.06972	0.8762	1.09881		1.48651	0.95175					1.28168	0.902229
0.8819	1.33893			0.893975	1.18674	0.8615	1.07159		1.57254	0.9412					1.42235	0.909143
0.856325	1.21712			0.915	1.03262	0.869333	1.09297		1.55582	0.9619					1.32967	0.888717
0.859833	1.41173			0.818633	1.30815	0.8917	1.13949		1.33374	0.943967					1.33076	0.893733
0.8366	1.30162			0.832367	1.23737	0.905975	1.23263		1.29513	0.9178					1.35322	0.88315
0.8581	1.26223			0.801933	1.29249	0.866167	1.29605		1.24816	0.892622					1.25971	0.9214
0.86985	1.1761			0.8435	1.41902	0.8632	1.38571		1.29117	0.874717					1.14389	0.932433
0.845725	1.22199			0.889575	1.33065	0.861	1.43313		1.30099	0.8594					1.11181	0.941
0.8805	1.43585			0.840217	1.27664	0.8364	1.38363		1.14388	0.9223					1.06798	0.9393
0.93405	1.42332			0.8875	0.923489	0.9039	1.60119		1.51362	0.9705					0.884881	0.9026
0.871233	1.33039			0.7768	1.51958	0.9386	1.32028		0.957091	0.92624					1.18211	0.8939
0.818367	1.41002			0.9078	1.31742	0.9033	1.3605		1.20364	0.92262					1.43142	0.89205
0.833325	1.26514			0.914	1.35567	0.8943	1.30318		1.27895	0.92					1.35797	0.9017
0.82925	1.21098			0.8691	1.27551	0.886329	1.18923		1.11634	0.90148					1.47302	0.9187
0.8124	1.34225			0.858967	1.32373	0.892233	1.06674		1.1473	0.93065					1.41526	0.8936
0.895775	1.40626			0.86565	1.16494	0.8725	0.794218		1.16491	0.9344					1.40502	0.9257
0.883286	1.3755			0.87	1.12794	0.8975	0.945333		1.0596	0.9471					1.15541	0.922
0.9126	1.40043			0.86235	1.22034	0.86875	1.005		1.2165	0.9413					1.20841	0.8073
0.9593	1.20628			0.85402	1.34087	0.90198	1.21859		1.2344	0.9495					1.26715	0.90295
0.921	1.22098			0.87214	1.23524	0.890733	1.19583		0.899048	0.9273					1.43212	0.9046
0.9267	1.30479			0.8247	1.32231	0.8546	1.23428		1.02513	0.9353					1.45218	0.9378
0.8769	0.941141			0.8178	1.35691	0.8553	1.01143		0.930627	0.90645					1.32156	0.9088
0.9064	1.07754			0.8279	1.35268	0.8472	1.27988		0.972479	0.878975					1.21881	0.88174
0.8918	1.26305			0.796233	1.37442	0.8221	1.3108		1.1661	0.889					1.29499	0.874786
0.9252	1.31705			0.8535	1.19377	0.878	0.828407		1.27921	0.920825					1.25135	0.890575
0.9086	1.27979			0.84875	1.34055	0.8937	0.967917		1.1057	0.918143					1.15475	0.893517
0.8827	1.17596			0.832867	1.37366	0.873	1.00433		1.11797	0.934617					1.23106	0.90075
0.907767	1.29154			0.8314	1.25944	0.84095	1.02833		0.874904	0.92555					1.11038	0.90015
0.903	1.34659			0.84235	1.31778	0.8506	1.0558		1.11306	0.9417					1.21667	0.917
0.9664	1.2931			0.874	1.45039	0.8337	1.12371		1.24528	0.944643					1.14217	0.89715
0.878467	1.13434			0.89732	1.35926	0.8543	1.05458		1.19571	0.948925					1.29571	0.8798
0.84798	0.733208			0.863433	1.33502	0.837	0.995151		1.21845	0.9497					1.31424	0.906425
0.8129	0.913657			0.87665	1.34042	0.85875	0.962264		1.03438	0.935					1.23004	0.91584
0.840271	1.05688			0.858167	1.33179	0.82555	1.19422		1.20509	0.9394					1.15772	0.90588
0.834086	1.21958			0.9022	1.2631	0.882533	1.19898		0.923005	0.9555					1.27564	0.9366
0.897	1.33147			0.91225	1.14768	0.92705	1.16065		0.959372	0.928133					1.26158	0.919388
0.94555	1.212			0.9237	1.21137	0.90195	1.25974		1.24873	0.9601					1.22943	0.925217
0.9186	1.08455			0.9326	1.3985	0.8651	1.17746		1.29637	0.95					1.21961	0.924917
0.8917	1.28781			0.909	1.21044	0.86805	0.915822		1.03548	0.9466					1.32219	0.920767
0.903533	1.16693			0.9361	1.21107	0.9168	1.01141		1.21939	0.947633					0.992644	0.939683
0.872175	0.975457			0.9406	1.41833	0.9035	1.2728		1.33779	0.96555					0.771071	0.916667
0.8801	1.17472			0.833	1.34341	0.8915	1.25248		1.1853	0.97295					1.06235	0.9013
0.8805	1.08485			0.90325	1.47079	0.884533	1.266		1.09532	0.9334					1.11349	0.9264
0.85415	0.724539			0.882467	1.49802	0.9247	1.1379		0.895594	0.9687					1.21284	0.913367
0.9048	1.02431			0.90056	1.3453	0.8715	1.37478		1.05383	0.97335					1.20939	0.920367
0.9087	1.2289			0.9012	1.34469	0.8815	1.32087		1.00894	0.9596					1.131	0.915133
0.8834	0.845677			0.895075	1.31953	0.9205	1.44831		1.03378	0.94955					1.1351	0.94355
0.927767	1.46379			0.89558	1.31636	0.88845	1.40224		1.07659	0.95775					1.21362	0.9537
0.9518	0.736474			0.881183	1.30858	0.8534	1.33337		1.16972	0.958267					1.20078	0.9156
0.89555	0.573584			0.883912	1.31579	0.881367	1.21139		1.04027	0.960086					1.13811	0.9127
0.9473	0.768261			0.87028	1.34187	0.902775	1.3401		1.02603	0.955533					1.27857	0.893367
0.940967	0.877721			0.8954	1.26408	0.87295	1.10976		1.20131	0.9499					1.32696	0.896287
0.9381	1.16904			0.8963	1.13405	0.869575	1.19532		1.3109	0.93386					1.31436	0.897257
0.94	1.14075			0.865943	1.21211	0.889043	1.21063		1.29432	0.9268					1.29202	0.90575
0.8885	1.04121			0.9232	1.38024	0.926417	1.19856		1.29061	0.92732					1.35777	0.93705
0.91845	0.962944			0.9713	1.69867	0.94085	1.12333		1.51997	0.91625					1.15138	0.911475
0.91665	1.11461			0.9691	1.55184	0.942225	1.02562		1.30699	0.8734					1.29124	0.92505
0.9127	1.09726			0.9353	1.28978	0.93908	1.04991		1.40854	0.869457					1.1295	0.9647
0.9084	1.19258			0.9202	1.31995	0.94685	1.00972		1.37628	0.88586					1.26008	0.93635
0.90105	1.20029			0.8653	1.27245	0.893833	1.00162		1.37276	0.8792					1.32055	0.9307
0.9202	1.12793			0.8597	1.25962	0.90715	0.763426		1.42833	0.9254					1.24582	0.924737
0.91695	1.08685			0.9082	1.23622	0.900575	1.02872		1.44586	0.9114					1.24039	0.926
0.9226	1.19973			0.8932	1.33881	0.882617	1.20351		1.33121	0.9085					1.26162	0.915587
0.91295	1.29065			0.889	1.28307	0.913733	1.16867		1.35053	0.93126					1.36859	0.925625
0.8981	1.40503					0.92105	0.85734		1.38012	0.951733					1.24513	0.9446
0.89864	1.11946					0.905	0.704869		1.32105	0.912025					1.29869	0.9207
0.919025	1.26451					0.8861	1.19935		1.30511	0.86648					1.14574	0.9615
0.8858	0.988678					0.9007	1.23849		1.33862	0.88494					1.41688	0.9444
0.9109	1.20053					0.928438	1.02938		1.44489	0.90754					1.42013	0.929675
0.9298	1.16547					0.900467	0.957166		1.44129	0.91592					1.39367	0.88655
0.9579	1.1743					0.8368	1.05232		1.37334	0.92602					1.3092	0.8772
0.928825	1.375					0.869925	1.30642		1.28223	0.930975					1.36419	0.80725
0.933725	1.40669					0.90625	1.22853		1.33901	0.9351					1.34827	0.872
0.9286	1.3248					0.9294	1.26977		1.1287	0.9259					1.34718	0.852433
0.943875	1.35257					0.922783	1.12745		1.16098	0.926133					1.43411	0.8835
0.8903	1.2138					0.8877	1.10001		1.17479	0.919					1.36958	0.8809
0.9045	1.50323					0.8711	0.929827		1.33271	0.9175					1.30451	0.9051
0.9021	1.38573					0.854733	0.994959		1.4272	0.912					1.22729	0.8781
0.936725	1.52368					0.86665	0.985039		1.1955	0.90166					1.31494	0.8859
0.9525	1.46862					0.946767	0.871453		1.43781	0.9067					1.26401	0.85335
0.9308	0.613543					0.938033	1.13376		1.40084	0.916767					1.36135	0.884925
0.954	0.980155					0.924467	1.26835		1.23304	0.9311					1.40029	0.889833
0.9163	1.15949					0.876633	1.19044		1.3725	0.95565					1.42953	0.9167
0.954	0.382928					0.90555	1.25582		1.26587	0.9636					1.34941	0.912375
0.909	0.33725					0.91185	1.16548		1.32522	0.952					1.27989	0.900767
0.9047	1.03188					0.8981	1.17224		1.29578	0.95592					1.26755	0.87475
						0.9149	1.19898		1.44657	0.9606					1.33259	0.871025
						0.891667	1.26855		1.38584	0.952475					1.25656	0.884467
						0.91225	1.3867		1.3725	0.9614					1.03746	0.857483
						0.902483	1.35579		1.19459	0.9582					1.18715	0.858875
						0.9383	1.47413		1.04626	0.930533					1.20629	0.846975
						0.89294	1.28089		0.941026	0.937925					1.21441	0.864425
						0.900925	1.34056		0.621129	0.92575					1.24004	0.86114
						0.909033	1.4195		0.829439	0.9516					1.40881	0.91785
						0.87985	1.35126		0.875465	0.916825					1.11117	0.90814
						0.9101	1.25799		1.04726	0.917988					1.17394	0.902
						0.914325	1.32077		1.02155	0.93505					1.20632	0.889575
						0.93838	1.39331		0.930823	0.9474					1.08566	0.8992
						0.954167	1.24824		1.07753	0.9509					1.06177	0.922317
						0.9376	1.07872		0.734462	0.9318					1.09593	0.88265
						0.9554	1.37624		0.924218	0.9783					1.19734	0.90855
						0.94278	1.05011		1.01146	0.94725					1.22615	0.9168
						0.94615	0.948891		1.06486	0.975					1.14304	0.9059
						0.9495	0.910835		1.16656	0.9601					1.06091	0.9294
						0.8549	1.12682		0.57059	0.9476					0.858002	0.9302
						0.8715	1.02153		0.832532	0.9488					0.93644	0.9295
						0.8558	1.03813		1.01113	0.956					1.21832	0.902
						0.86796	1.25467		1.0125	0.9575					1.16608	0.9042
						0.85765	1.25904		1.18525	0.9587					1.06464	0.9031
						0.9128	1.29341		1.21791	0.938					1.18758	0.9077
						0.892533	1.34053		1.29535	0.929025					1.33843	0.8952
						0.893233	1.3269		1.33561	0.89355					1.33782	0.8914
						0.92265	1.29837		1.13258	0.9727					1.25289	0.88895
						0.9251	1.01064		1.29016	0.9464					1.09317	0.905833
						0.8967	1.21657		1.35877	0.917125					1.34855	0.881433
						0.854125	1.16048		1.19419	0.901533					1.45212	0.935767
						0.8217	1.16982		1.13952	0.9654					1.29395	0.901
						0.855533	1.26671		1.18314	0.949067					1.19661	0.927633
						0.9046	1.28232		1.31913	0.959233					1.14148	0.9245
						0.8847	1.21626		1.28777	0.926825					1.18506	0.8962
						0.89685	1.28453		1.32184	0.9027					1.2326	0.878475
						0.8674	1.36975		1.39654	0.90756					1.24186	0.909725
						0.879075	1.37559		1.36279	0.910767					1.1772	0.89764
						0.92728	1.39634		1.4648	0.927975					1.12269	0.916633
						0.9287	1.40185		1.3312	0.9663					1.16624	0.9053
						0.904171	1.29424		1.38979	0.9509					1.22357	0.912233
						0.891375	1.22098		1.3849	0.93715					1.28445	0.9187
						0.9542	1.21425		1.27604	0.94155					1.28909	0.9355
						0.91115	1.14781		1.09002	0.8858					1.375	0.92885
						0.90928	1.11508		0.996705	0.851711					1.30919	0.887167
						0.918767	1.01157		0.92624	0.889967					1.34367	0.89895
						0.906575	1.15174		1.14491	0.89404					1.09136	0.9075
						0.87704	1.09004		1.17272	0.885022					1.03037	0.9001
						0.9136	1.30524		1.31318	0.913857					1.19851	0.8991
						0.899667	1.17142		1.27329	0.93162					1.16559	0.924033
						0.9104	1.32685		1.21942	0.94725					1.25718	0.935833
						0.8913	1.39884		1.211	0.936567					1.13644	0.922133
						0.8555	1.13396		1.27436	0.92185					1.1742	0.9339
						0.8988	1.12559		1.36845	0.93775					1.30885	0.9237
						0.906233	0.98232		1.24499	0.961					1.3316	0.9556
						0.899533	1.05443		1.14204	0.94355					1.30028	0.91345
						0.870113	1.22703		1.22309	0.937325					1.27982	0.925167
						0.878733	1.30954		1.05022	0.918557					1.37564	0.8585
						0.8776	1.18337		0.967676	0.9221					1.41494	0.843325
						0.8892	1.15257		1.28181	0.944233					1.42628	0.842425
						0.921533	1.20769		1.32566	0.9229					1.19711	0.884167
						0.9335	1.18454		1.29423	0.9026					1.27639	0.8596
						0.88164	1.13305		1.38552	0.914033					1.48622	0.8557
						0.9399	0.92331								1.40197	0.906625
						0.9275	1.04056								1.27478	0.9046
						0.895867	1.07283								1.24385	0.9032
						0.902425	1.04925								1.29623	0.891029
						0.8558	1.21664								1.34881	0.841
						0.9123	1.08853								1.32396	0.8913
						0.9027	1.13862								1.20557	0.922471
						0.882075	1.29431								1.25586	0.884933
						0.8815	1.25271								1.25303	0.891625
						0.9182	1.18376								1.27387	0.887783
						0.9069	1.19687								1.24693	0.9022
						0.9207	1.37136								1.13702	0.894475
						0.884667	1.27982								1.21717	0.89875
						0.900125	1.28895								1.25203	0.87445
						0.9003	1.0801								1.34435	0.8599
						0.91368	1.05339								1.26145	0.8613
						0.9076	1.03586								1.41148	0.89435
						0.8731	1.39876								1.4212	0.905367
						0.88122	1.35529								1.31374	0.8885
						0.91385	1.33635								1.28625	0.9047
						0.916683	1.28131								1.32523	0.9141
						0.91335	1.28999								1.28631	0.89608
						0.906725	1.30217								1.33595	0.879225
						0.82505	1.34666								1.36129	0.859667
						0.8869	1.34218								1.33051	0.84355
						0.87264	1.34974								1.30901	0.860387
						0.863367	1.23892								1.36342	0.874511
						0.87406	1.2479								1.31842	0.85536
						0.836333	1.28763								1.28463	0.864812
						0.87955	1.26705								1.28382	0.882887
						0.8643	1.28828								1.36761	0.894743
						0.895357	1.31805								1.44112	0.90755
						0.8761	1.31083								1.25184	0.89515
						0.835133	1.34773								1.30137	0.89285
						0.88608	1.34288								1.26382	0.863829
						0.883325	1.20059								1.29687	0.874133
						0.865	1.21847								1.27426	0.874617
						0.88855	1.24289								1.442	0.95275
						0.92705	1.33639								1.26893	0.961475
						0.91145	1.35441								1.29746	0.936075
						0.9224	1.33727								1.16672	0.935
						0.92475	1.33147								1.30247	0.931275
						0.9029	1.27216								1.31661	0.9672
						0.88445	1.24524								1.32807	0.921183
						0.8797	1.2309
						0.8761	1.1663
						0.9202	1.2119
						0.8278	0.967688
						0.8332	1.08535
						0.8562	1.05823
						0.8625	1.04052
						0.88562	1.30232
						0.87984	1.04424
						0.8682	1.05345
						0.864575	1.17798
						0.93	0.980251
						0.8421	0.887621
						0.882633	1.13089
						0.902775	1.13061
						0.8952	1.05914
						0.89495	1.06527
						0.91635	0.891681
						0.9183	0.911726
						0.88075	1.07904
						0.88828	1.17585
						0.863	1.09459
						0.8792	1.21621
						0.88445	1.12274
						0.878567	1.25699
						0.87498	1.26952
						0.855475	1.2365
						0.8922	1.26881
						0.9037	0.982477
						0.8494	1.26988
						0.877567	1.4132
						0.8795	1.28066
						0.888575	1.26981
						0.889667	1.21003
						0.89425	1.27082
						0.871075	1.32563
						0.8518	1.31704
						0.8665	1.3393
						0.88562	1.35454
						0.89375	1.34985
						0.8643	1.16725
						0.8661	1.3259
						0.8762	1.29739
						0.91218	1.17243
						0.9169	1.14332

## Sheet: FMF vs AAE
Relationship between fine mode fraction (FMF) and absorption angstrom exponent (AAE)
				Data source: AERONET (https://aeronet.gsfc.nasa.gov/cgi-bin/webtool_inv_v3)
Time: 12:00:00 pm, Location: Dhaka (23.72839, 90.39819), Bhola (22.22668, 90.75642)
Dhaka (2012-2019)									Bhola (2013-2019)
Pre-monsoon		Monsoon		Post-Monsoon		Winter			Pre-monsoon		Monsoon		Post-monsoon		Winter
AAE	FMF	AAE	FMF	AAE	FMF	AAE	FMF		AAE	FMF	AAE	FMF	AAE	FMF	AAE	FMF
1.20978	0.781354	1.913	0.489187	1.03415	0.918127	1.19958	0.93118		0.914084	0.804223	0.830178	0.606304	0.116033	0.786043	1.08652	0.863465
1.00327	0.875676	1.6245	0.42095	0.890729	0.84073	1.20431	0.969827		0.968796	0.78558	0.851448	0.580851	1.47371	0.641628	0.515213	0.966333
0.918543	0.897099	1.27922	0.588848	1.06756	0.888227	1.1988	0.955144		0.811167	0.781246	0.894957	0.463606	1.08936	0.858449	0.843753	0.932668
1.19725	0.789088	0.82259	0.841508	1.27456	0.893511	1.70795	0.977825		0.965326	0.776136	1.24707	0.470244	1.304	0.716166	0.186884	0.917101
1.25988	0.831564	0.936211	0.892598	0.999691	0.832592	0.985113	0.941766		1.37424	0.468023	1.08108	0.859307	1.19349	0.802389	0.295114	0.940368
1.71172	0.870294	0.144137	0.711544	1.05106	0.918938	1.06037	0.914446		1.0906	0.606			1.11974	0.908442	1.14741	0.929372
1.32071	0.782154	1.5653	0.662058	1.0376	0.953858	0.67907	0.920435		1.30063	0.764478			1.32765	0.972304	0.951364	0.977301
1.09676	0.897442	1.65733	0.529278	1.08313	0.943502	0.824301	0.79483		1.22573	0.820131			0.362306	0.953872	1.82818	0.982377
1.42973	0.602588	0.521113	0.715543	1.0046	0.912045	0.840045	0.887263		1.50294	0.837633			0.727777	0.963718	1.21741	0.975865
1.36761	0.60248	0.917924	0.863105	1.35228	0.926151	1.04545	0.9303		1.46493	0.742913			0.804379	0.971488	1.29326	0.956399
1.46046	0.762231	1.54431	0.62074	1.13871	0.939482	1.03255	0.973029		1.35867	0.831193			1.15806	0.943786	1.3448	0.980151
1.42585	0.789263	1.88152	0.649768	1.12019	0.95135	1.31741	0.974088		1.46012	0.748444			1.25541	0.980167	1.65724	0.979787
1.32487	0.550643	1.72677	0.685274	1.2871	0.91459	0.970327	0.969402		1.89184	0.73592			1.24527	0.980579	1.63176	0.970243
1.62561	0.472005	1.40058	0.624427	1.03401	0.899336	1.0954	0.960412		1.57968	0.640147			0.688914	0.972368	1.47646	0.964933
1.9019	0.685442	1.2978	0.659437	1.06357	0.936877	1.09702	0.946332		1.71902	0.632236			0.955087	0.964694	1.02955	0.952742
1.54046	0.56873	1.19259	0.887499	1.11094	0.969104	1.68903	0.951135		1.73685	0.591115			1.22244	0.975773	1.51901	0.963557
1.35493	0.616652	1.1206	0.876964	1.24232	0.969227	1.2729	0.963698		2.62775	0.347319			0.886454	0.940823	1.2629	0.977668
1.96106	0.678626			1.26734	0.892001	1.14893	0.944757		0.422492	0.802308			1.04855	0.965366	1.17512	0.967397
1.75524	0.645824			1.04571	0.945426	0.99112	0.956996		0.871431	0.739408			1.12816	0.956919	1.30957	0.969055
1.60887	0.464245			1.0075	0.939336	0.720881	0.947547		0.776411	0.755001			1.21523	0.943253	1.148	0.967513
1.68558	0.633871			0.716618	0.869619	0.991743	0.808817		1.34136	0.908765			1.31274	0.964649	1.35113	0.97405
1.33179	0.870514			1.01979	0.887191	1.08497	0.978825		1.66912	0.416032			1.1174	0.961791	1.50365	0.979578
1.08481	0.898713			1.12117	0.890732	1.21686	0.969714		1.18063	0.606598			1.13109	0.952562	1.34893	0.96975
0.999684	0.896432			0.890236	0.917356	1.23188	0.962962		1.23312	0.605709			1.30263	0.979644	1.42681	0.956785
1.00866	0.895196			1.42332	0.862832	1.15088	0.978616		0.501377	0.633069			1.15979	0.97369	1.47843	0.960573
0.853564	0.810876			1.79912	0.94059	1.19264	0.963622		1.00029	0.836			0.869145	0.955675	1.66548	0.975104
1.93738	0.573027			1.09168	0.955709	1.1121	0.881897		0.376181	0.429405			1.52952	0.952452	1.34254	0.974936
1.61417	0.581126			1.51847	0.885238	1.28249	0.902454		1.16341	0.970331			0.996606	0.941038	1.02799	0.946062
1.95611	0.547909			1.04597	0.869687	1.813	0.963136		1.11788	0.972269			0.955925	0.880459	1.79485	0.871801
1.1849	0.648742			1.28464	0.934296	1.45743	0.917469		1.31204	0.967738			1.2022	0.936444	1.18501	0.867345
1.29082	0.621808			1.15368	0.959029	2.05087	0.3767		1.46165	0.892579			1.16074	0.947314	1.3859	0.866534
0.953592	0.878796			1.36464	0.965804	1.21321	0.929742		1.282	0.966409			0.895261	0.861137	1.02804	0.911885
1.16067	0.729917			0.900312	0.956416	1.04439	0.912233		1.35463	0.960962			1.24185	0.965465	1.25184	0.886563
0.895725	0.674823			1.12149	0.958373	1.28405	0.947097		1.35788	0.919546			1.28878	0.959355	1.16433	0.946819
0.757563	0.694794			0.972272	0.968389	1.26558	0.95519		1.52427	0.847422			1.15245	0.935158	1.28022	0.954279
1.38658	0.713478			0.869045	0.972071	1.33935	0.93649		1.26307	0.926326			1.14864	0.971645	1.21725	0.959053
1.05031	0.872038			1.39621	0.941119	1.34444	0.939585		1.30874	0.9328			1.21516	0.974079	1.38453	0.954854
1.05145	0.828778			1.37034	0.961535	2.66924	0.304602		1.31149	0.922838			0.930055	0.96654	1.39857	0.972127
1.5772	0.568314			1.15293	0.973672	1.17812	0.976525		1.37542	0.921703			1.33341	0.965726	1.34613	0.972996
1.81931	0.651789			1.47311	0.974962	1.20581	0.975078		1.19374	0.947553			1.21872	0.903018	1.39253	0.976066
1.75022	0.66132			1.16253	0.973999	1.2812	0.960399		2.23335	0.716523			1.15117	0.899256	1.59156	0.965274
2.0807	0.780664			1.35386	0.97599	1.32591	0.976999		1.78182	0.728338			1.24313	0.954921	1.19906	0.944819
1.92958	0.698476			1.9413	0.977637	1.0938	0.969638		0.811653	0.735181			1.29665	0.891906	1.21469	0.971088
1.50099	0.819239			1.55442	0.948517	1.34126	0.937604		1.74159	0.674832			0.794313	0.897412	1.36825	0.958669
1.02367	0.803558			1.72766	0.972349	1.2315	0.945902		1.47467	0.703838			1.3162	0.961814	1.56934	0.974785
1.57306	0.59832			1.43854	0.960728	0.9056	0.884038		1.42088	0.864122			1.15687	0.955965	0.825371	0.970049
1.48007	0.677204			1.31484	0.968184	1.01373	0.93389		1.01531	0.949137			1.0271	0.972341	1.6698	0.973516
1.18497	0.690377			1.43188	0.956369	0.927875	0.930808		2.05981	0.763495			1.16108	0.971996	1.46283	0.953539
0.953912	0.648685			1.09165	0.951617	1.20655	0.902021		1.78311	0.697934			1.60307	0.96969	0.754759	0.924472
1.41661	0.73122			1.38575	0.971501	0.843275	0.761245		1.6285	0.582105			1.0872	0.9009	1.06855	0.959583
1.13876	0.757639			0.970604	0.933253	1.70325	0.839875		2.04671	0.344703			1.30727	0.955	1.14784	0.929249
1.1412	0.82675			1.5928	0.895878	0.964864	0.72225		1.96677	0.528768			1.30075	0.925674	1.2755	0.933765
1.02923	0.570349			1.36705	0.927036	1.25999	0.81946		1.47208	0.776642			1.37685	0.900995	1.43204	0.915031
1.26197	0.658937			1.51013	0.949503	1.2821	0.84153		1.79828	0.730249			1.3059	0.946167	1.61463	0.924147
1.17443	0.710072			1.34645	0.95925	0.93366	0.901538		1.54679	0.761176			1.31699	0.952339	1.47679	0.957151
0.855541	0.603419			1.17897	0.977812	1.10636	0.904304		1.7771	0.758127			1.46533	0.93419	1.42112	0.978042
0.980273	0.820034			1.11765	0.96089	1.26192	0.951094		1.44257	0.687905			1.4887	0.962555	1.3566	0.938313
1.00116	0.537459			1.10049	0.951984	1.11315	0.93189		1.98002	0.669162			1.22638	0.968689	1.17031	0.922654
1.02467	0.627387			1.10103	0.916626	0.967123	0.961706		1.21241	0.761676			1.2973	0.967615	1.31584	0.941311
1.74384	0.824473			0.725302	0.944308	2.09008	0.971461		1.39559	0.712298			1.31008	0.973182	1.43634	0.975223
1.13917	0.548754			1.26387	0.941568	1.07619	0.974233		1.6368	0.813894			1.34757	0.946423	1.29095	0.963585
0.948077	0.63784			1.18599	0.960943	1.39089	0.973484		1.16436	0.906331			0.749861	0.848451	1.78055	0.940883
1.76168	0.621795			1.19894	0.943716	1.3379	0.976885		0.400168	0.681918			0.818552	0.89527	1.39702	0.945892
0.754777	0.675197			1.26943	0.932232	1.03899	0.976592		1.39797	0.530772					1.30488	0.962301
0.889427	0.754026			1.07854	0.945319	1.3189	0.977026		1.11626	0.416523					1.11637	0.950247
0.370233	0.722518			1.06419	0.877653	1.0771	0.976964		1.06341	0.756863					1.4284	0.93549
0.308925	0.695316			1.09061	0.866023	1.1632	0.976454		0.993887	0.786353					1.48617	0.968049
1.17934	0.915223			1.14846	0.904387	1.10709	0.977268		1.11516	0.81074					1.34262	0.973292
0.781254	0.889925			1.14764	0.963096	1.47183	0.96953		0.724394	0.950609					1.60558	0.97505
1.31191	0.827164			1.21878	0.971941	1.33691	0.947589		0.756363	0.923697					1.36238	0.96412
1.22714	0.744896			1.15614	0.970004	1.22391	0.913952		1.08584	0.915168					1.35526	0.932576
1.41351	0.817832			1.32114	0.768842	1.19758	0.955475		0.620956	0.861422					1.34047	0.965369
1.59104	0.775551			1.24311	0.856352	1.48283	0.910122		1.10826	0.768342					1.06788	0.920009
1.45142	0.754838			1.34477	0.837526	1.2042	0.911144		1.06175	0.706559					0.238866	0.945516
1.32793	0.691019			1.06278	0.879479	1.31809	0.878527		1.11133	0.711198					0.847404	0.947713
1.46955	0.632834			1.21134	0.92417	1.21984	0.88983		1.11783	0.748067					0.635304	0.96428
1.31265	0.896256			1.35773	0.878165	0.962342	0.888296		1.19707	0.714652					0.455607	0.960792
1.08304	0.897345			1.4197	0.702366	1.2243	0.978435		1.28447	0.859524					0.787301	0.7878
1.20819	0.792652			1.37143	0.869947	1.57857	0.96176		1.51725	0.564738					0.578873	0.890629
1.42996	0.798367			1.01829	0.965602	1.61608	0.940132		1.10306	0.711534					0.600658	0.947703
1.26785	0.773883			1.17043	0.893522	1.54345	0.932015		1.44895	0.73035					0.463213	0.918451
1.12249	0.748707			0.95601	0.880982	1.39388	0.971132		1.16978	0.720981					0.445624	0.953168
1.76711	0.808164			1.08532	0.905698	1.19427	0.585774		1.5484	0.655022					0.393091	0.953759
1.08627	0.906941			1.09723	0.956819	1.54064	0.921036		1.45021	0.730879					0.400312	0.959686
1.25897	0.880739			1.17765	0.957497	1.6938	0.922242		1.3361	0.719298					0.313274	0.917635
1.13198	0.878214			1.27647	0.949637	1.72752	0.96761		1.22792	0.798701					1.09299	0.839563
0.883924	0.944734			1.30341	0.944402	1.6031	0.967485		1.07021	0.832064					0.918676	0.937056
1.51754	0.938186			1.27365	0.963249	2.02414	0.934383		2.00302	0.620778					0.554228	0.907261
1.04397	0.738518			2.18392	0.938866	2.0891	0.840902		1.43032	0.689996					0.734526	0.955577
1.85196	0.587798			1.50005	0.878964	1.66135	0.861031		1.39051	0.60997					0.601862	0.773913
0.825339	0.632729			1.54229	0.90263	1.84692	0.790091		1.38712	0.604351					1.20115	0.961628
1.17605	0.943368			1.47815	0.863239	1.07442	0.723667		1.33909	0.676573					1.25705	0.95215
1.32487	0.965368			1.0011	0.895077	0.898042	0.916855		1.02164	0.769553					0.998672	0.972249
1.21874	0.937211			1.01734	0.881738	1.51694	0.937468		1.58091	0.713382					1.28035	0.977315
1.26832	0.879385			0.901067	0.885535	1.26337	0.902976		1.20419	0.678661					1.38327	0.972495
1.33575	0.928985			1.11983	0.890832	0.879326	0.956336		1.79432	0.558291					1.20998	0.980319
1.33088	0.936273			1.08821	0.881051	1.08832	0.919997		1.56218	0.6559					1.8642	0.943817
1.49824	0.70637			0.93714	0.929127	0.820387	0.9319		1.28313	0.7197					1.18155	0.964009
1.66407	0.460255			0.8584	0.938505	1.11384	0.937292		1.26246	0.672766					0.713339	0.932516
1.65559	0.539255			0.882956	0.911557	1.33495	0.934362		1.1203	0.732093					1.44868	0.953413
1.50633	0.633315			0.447122	0.848367	1.1691	0.877483		1.35466	0.647631					1.1862	0.965022
1.4618	0.714098			1.28272	0.931653	1.08883	0.928976		1.20548	0.70259					1.20347	0.970421
1.21758	0.817248			1.87536	0.792216	0.941622	0.925928		1.998	0.611335					1.37403	0.974732
1.57551	0.90667			2.61985	0.33287	1.21289	0.93627		1.75714	0.585477					1.11977	0.979322
1.37083	0.861823			1.71739	0.978511	0.97383	0.850561		1.75372	0.716779					1.17748	0.982519
1.47726	0.74647			1.24525	0.938555	0.797172	0.719361		0.815894	0.795309					1.21135	0.982241
1.60137	0.680657			1.49007	0.912533	1.04885	0.924539		1.75796	0.639805					1.29789	0.977574
1.60034	0.579804			2.01199	0.979075	1.30247	0.939869		1.20613	0.701702					1.45148	0.978687
1.4415	0.688973			1.17063	0.941241	2.19596	0.378431		0.746421	0.809951					1.64039	0.951506
1.44137	0.653008			1.11085	0.787611	0.982498	0.819539		1.1233	0.692495					1.68756	0.912155
1.75779	0.478223			1.59324	0.962839	0.836864	0.971652		1.53663	0.674681					1.19867	0.875665
2.54583	0.340094			1.2233	0.926846	1.29744	0.93453		0.243065	0.569331					1.39692	0.943175
1.7406	0.684228			1.65719	0.956848	0.926091	0.898034		1.3409	0.66157					1.34708	0.9559
1.73872	0.546391			1.85848	0.957302	1.07302	0.933732		1.54012	0.638933					1.3037	0.974567
1.30831	0.932757			1.7446	0.974694	1.07806	0.868457		1.57507	0.617382					1.38956	0.966724
1.4844	0.547564			1.63328	0.975458	1.1981	0.8387		1.22397	0.633016					0.665375	0.969142
2.07439	0.360926			1.64747	0.971542	1.1075	0.727043		1.37219	0.679					1.82982	0.910715
1.80119	0.468324			1.73908	0.974489	1.09554	0.727088		1.57731	0.595215					1.08929	0.948053
1.84662	0.539419			1.74013	0.960002	0.9643	0.724455		1.41484	0.589496					1.36999	0.923012
2.07385	0.815097			1.53717	0.980091	1.46817	0.698425		0.540896	0.745927					1.30436	0.925223
1.98342	0.755482			1.49693	0.981867	0.841635	0.948717		1.37472	0.827003					1.31009	0.95629
2.09503	0.67918			1.49381	0.955684	1.06077	0.972075		1.29677	0.811887					1.19093	0.970356
2.5472	0.387935			1.93218	0.920763	1.04326	0.952454		1.55035	0.854207					1.58881	0.974813
1.9585	0.693522			1.19712	0.953153	0.902923	0.968241		1.06804	0.954643					0.979014	0.978726
1.71972	0.636246			1.14776	0.978956	0.786782	0.972183		1.12319	0.8572					0.883169	0.973748
1.09009	0.770792			1.40773	0.96587	1.32255	0.982541		1.15321	0.898484					0.744982	0.979406
1.84811	0.78309			1.52439	0.972983	1.35338	0.921684		1.11987	0.842352					1.44923	0.973699
2.22082	0.574462			1.71569	0.949235	1.22609	0.910701		1.24993	0.805487					1.10005	0.961134
1.80241	0.673598			1.93381	0.950331	1.20858	0.925712		1.20636	0.832537					1.12128	0.963746
1.23944	0.653232			1.17402	0.910416	1.01955	0.944471		1.37351	0.831849					1.27447	0.976414
1.65661	0.927099			1.75716	0.924516	1.33226	0.959909		1.831	0.81841					1.27092	0.964366
1.33613	0.820209			1.37796	0.92619	1.14678	0.910485		1.18921	0.921548					0.974375	0.962617
1.77004	0.731867					1.45938	0.809792		1.18759	0.960184					1.53274	0.945963
1.68502	0.798987					0.834312	0.913609		1.34334	0.873519					1.25651	0.953316
2.20788	0.742723					1.08442	0.93513		1.22473	0.796874					1.61779	0.959522
1.96301	0.721179					1.02528	0.931765		1.36348	0.885377					1.64122	0.950339
2.27267	0.782314					1.07937	0.913068		1.18751	0.909103					1.42381	0.968355
1.41652	0.924715					1.497	0.800631		1.30243	0.921617					1.43314	0.956857
1.75865	0.805389					1.17766	0.904859		1.3509	0.942806					1.26942	0.96815
1.68865	0.83369					0.86094	0.952156		1.54979	0.922805					1.06147	0.913091
2.21193	0.793229					0.71957	0.927171		1.13883	0.949899					1.17327	0.953883
2.00118	0.755822					0.686376	0.838151		1.61815	0.879683					1.28214	0.922932
1.8268	0.794467					1.10133	0.82215		1.57142	0.882859					1.09705	0.899576
1.31759	0.894497					0.854324	0.771984		1.58117	0.719722					1.25185	0.917699
1.57171	0.829129					0.933411	0.763062		1.56479	0.742486					0.855752	0.932341
1.08401	0.885684					1.10669	0.815136		1.47318	0.826855					1.77701	0.848274
1.25489	0.860437					1.09713	0.851604		1.41184	0.733541					1.0847	0.9341
2.3352	0.452441					1.01864	0.921266		1.17417	0.927394					1.09417	0.859359
1.60588	0.616079					1.01077	0.921153		1.31807	0.926299					0.992035	0.881019
1.43367	0.686579					0.939832	0.77044		1.25786	0.79278					1.34012	0.949192
1.84671	0.76979					0.946901	0.899781		1.00688	0.879791					0.867187	0.953353
1.4195	0.664688					0.844725	0.840425		1.00332	0.89237					1.05931	0.961651
2.76742	0.362163					1.19764	0.749205		1.313	0.876718					0.994758	0.943384
						1.307	0.854058		1.07433	0.812346					1.162	0.958291
						0.907465	0.768594		1.08653	0.832393					0.858882	0.926295
						1.10587	0.839059		0.956522	0.813945					1.05188	0.965222
						1.34523	0.886798		2.20247	0.772946					1.20663	0.667002
						0.363454	0.957751		1.17973	0.698783					1.16597	0.712298
						1.0234	0.902903		1.30108	0.609636					1.05744	0.714011
						0.9484	0.912274		1.28654	0.585354					1.15599	0.689298
						0.788991	0.941367		1.59989	0.419876					1.07456	0.750719
						1.43066	0.939127		1.61386	0.514513					1.00201	0.935365
						0.946854	0.937234		1.57018	0.525407					1.16163	0.919075
						1.12772	0.951219		1.52332	0.606497					2.22156	0.932066
						0.778585	0.95216		1.34728	0.58143					1.27504	0.929262
						0.933916	0.940357		1.11119	0.575879					1.7511	0.890705
						1.18746	0.945284		0.986773	0.595357					1.38955	0.900342
						0.967688	0.975321		2.5894	0.387194					1.22525	0.91141
						0.984729	0.948312		2.16473	0.60078					1.29151	0.955309
						1.54027	0.964888		1.40626	0.622867					1.32841	0.971047
						1.43252	0.924924		2.11087	0.614777					1.22705	0.962974
						1.40967	0.87979		0.633396	0.801229					1.31766	0.96962
						1.42756	0.89899		3.18401	0.352703					1.25836	0.959945
						1.21527	0.940136		1.65762	0.476629					1.06052	0.953662
						1.16692	0.937153		2.65133	0.614877					1.15999	0.956924
						0.336048	0.936194		1.49193	0.633516					0.925674	0.960649
						0.935356	0.954619		0.670639	0.727114					1.22841	0.96767
						1.1165	0.953302		1.18603	0.683033					0.968006	0.967003
						1.0948	0.969401		1.52555	0.798419					1.08474	0.958337
						1.62962	0.903843		1.21012	0.825288					0.902161	0.9437
						1.1248	0.912641		1.69975	0.760005					1.38276	0.969745
						1.08672	0.902099		1.32166	0.891089					1.13739	0.96998
						1.38522	0.8216		1.12048	0.891411					1.16822	0.96061
						1.17125	0.880274		1.23405	0.776279					1.23273	0.967147
						1.27811	0.921403		0.737802	0.926128					1.09527	0.924075
						1.37224	0.953722		0.890404	0.861991					1.17848	0.9677
						1.22831	0.959984		0.905184	0.795729					1.04528	0.920616
						1.30406	0.887238		1.31964	0.826135					1.2113	0.915103
						1.1716	0.930534		1.30065	0.807144					1.38734	0.881195
						1.04226	0.951262		1.23219	0.82358					1.36982	0.77052
						1.05509	0.972831		1.36242	0.835682					1.37874	0.787386
						1.06666	0.9425		1.44303	0.915908					1.26012	0.963001
						1.09797	0.931847		0.903556	0.916843					1.08563	0.954719
						1.1315	0.975382		1.36606	0.873402					1.18682	0.855968
						1.50315	0.87669		1.55436	0.889739					1.11595	0.840696
						1.15143	0.942498		1.3757	0.827998					0.988723	0.845865
						1.08687	0.963582		1.41604	0.670089					1.24982	0.953331
						1.16423	0.918318		1.59898	0.582511					1.44897	0.818062
						1.2318	0.769888		1.68836	0.56886					1.24036	0.819182
						1.10956	0.934636		1.56146	0.700664					1.00915	0.690704
						1.30551	0.937157		1.40972	0.699955					1.12822	0.659972
						1.29434	0.893245		1.3889	0.826459					1.01088	0.724776
						1.45777	0.904021		1.43311	0.811204					1.27815	0.738457
						1.32657	0.94799		1.46458	0.8806					1.26073	0.829089
						1.17375	0.925771		1.98396	0.740449					1.03685	0.786225
						1.51932	0.957728		1.67753	0.764334					1.26876	0.697849
						1.30415	0.923669		1.7106	0.792129					1.25224	0.732323
						1.32556	0.840633		1.55734	0.781115					0.530146	0.901819
						1.45655	0.923025		1.92438	0.74033					0.988834	0.888434
						1.26566	0.960508		1.63612	0.762806					0.785085	0.931379
						1.11151	0.97142		1.4387	0.689408					1.16006	0.912359
						1.07657	0.968138		1.90045	0.639427					1.33937	0.90285
						1.38286	0.977239		1.47548	0.764757					1.32021	0.933654
						1.23261	0.910914		1.53139	0.803988					1.32107	0.972726
						1.67965	0.975043		1.45918	0.778174					1.26523	0.958721
						1.40804	0.96725		1.56112	0.819123					1.30219	0.93186
						1.5904	0.963401								1.2405	0.956177
						1.4183	0.930377								1.30898	0.947568
						1.27541	0.910287								1.34189	0.956247
						1.05989	0.914807								1.08125	0.969233
						1.27224	0.88476								1.00189	0.907134
						1.40855	0.924445								1.29713	0.945767
						1.15231	0.87387								1.26279	0.978728
						1.19142	0.96028								1.43553	0.941327
						1.40587	0.944267								1.28265	0.971381
						1.00181	0.950998								1.25796	0.972226
						1.34417	0.955397								1.15819	0.977853
						1.22027	0.935271								1.20101	0.980345
						1.18878	0.941114								1.33927	0.971059
						1.36516	0.864687								1.23247	0.936399
						0.895678	0.87732								1.17898	0.928437
						1.08969	0.841532								1.43991	0.938823
						1.38957	0.889132								1.23109	0.957224
						1.16628	0.892279								1.25207	0.949096
						1.13644	0.955768								1.43179	0.962042
						1.29671	0.969548								1.28809	0.966157
						1.27991	0.963798								1.04419	0.958483
						1.38335	0.921466								1.14984	0.905552
						1.74013	0.912379								1.20873	0.941993
						0.897343	0.963998								1.25914	0.931393
						1.20635	0.964411								1.27468	0.944184
						1.289	0.96132								1.0756	0.920837
						1.27287	0.972319								1.16959	0.925494
						1.25999	0.931448								1.3868	0.905971
						1.22759	0.947383								1.24039	0.933781
						1.62952	0.949898								1.33807	0.950026
						1.13483	0.974335								1.20366	0.956243
						1.29571	0.963245								1.17924	0.96161
						1.13562	0.906288								1.16768	0.94796
						1.13411	0.964753								1.26819	0.891262
						1.02731	0.823218								1.31726	0.897608
						0.669806	0.823182								1.20021	0.911862
						1.12954	0.890777								1.46889	0.923438
						1.02797	0.955795								0.810309	0.973309
						1.33342	0.924308								1.62635	0.976803
						1.22914	0.94324								1.58543	0.970015
						1.1206	0.965734								1.23221	0.955233
						1.12756	0.929265								1.16316	0.91828
						1.13156	0.957771								1.6112	0.904066
						1.22148	0.944238								1.08613	0.918356
						1.11268	0.960105
						1.04513	0.979645
						1.29537	0.597036
						1.27906	0.670906
						1.41485	0.628551
						0.650769	0.806441
						1.9216	0.920718
						1.84532	0.879468
						1.75597	0.897362
						1.71623	0.888018
						2.7404	0.35616
						1.99006	0.751644
						1.61622	0.910014
						1.58564	0.964139
						1.75124	0.944143
						1.42396	0.942424
						1.45588	0.925047
						1.72208	0.957739
						1.77725	0.932648
						1.33253	0.939796
						1.45211	0.936936
						1.94783	0.934024
						1.44918	0.951036
						1.72976	0.953286
						1.48378	0.937823
						1.6037	0.929288
						1.43873	0.925141
						1.26632	0.90845
						0.98727	0.772858
						1.4917	0.889101
						1.19192	0.938303
						1.24245	0.969403
						1.28027	0.975329
						1.35029	0.964335
						1.33471	0.927706
						1.24968	0.937604
						1.42068	0.939643
						1.32524	0.934609
						1.31871	0.941026
						1.16615	0.912653
						1.95361	0.901659
						1.17306	0.921427
						1.25162	0.917104
						2.84969	0.894039

## Sheet: FMF vs AE
Relationship between fine mode fraction (FMF) and angstrom exponent (AE)
				Data source: AERONET (https://aeronet.gsfc.nasa.gov/cgi-bin/webtool_inv_v3)
Time: 12:00:00 pm, Location: Dhaka (23.72839, 90.39819), Bhola (22.22668, 90.75642)
Dhaka (2012-2019)									Bhola (2013-2019)
Pre-monsoon		Monsoon		Post-monsoon		Winter			Pre-monsoon		Monsoon		Post-monsoon		Winter
AE	FMF	AE	FMF	AE	FMF	AE	FMF		AE	FMF	AE	FMF	AE	FMF	AE	FMF
1.39975	0.878796	1.05983	0.609079	0.945752	0.54	1.25871	0.93118		1.24083	0.764478	0.875	0.894504	1.12795	0.73592	1.4498	0.860822
1.19992	0.729917	0.698976	0.489187	0.996275	0.571971	1.25308	0.945528		1.26272	0.820131	1.01538	0.765345	0.950225	0.540147	1.44797	0.901989
1.13595	0.674823	0.606636	0.42095	1.0936	0.644305	1.40088	0.969827		1.27476	0.837633	0.80495	0.502302	1.1634	0.913546	1.22827	0.923755
1.16848	0.694794	1.00209	0.736319	1.15911	0.8496	1.34728	0.955144		1.25093	0.742913	0.56808	0.747329	1.253	0.953295	1.40165	0.960637
1.26329	0.781002	1.05489	0.640915	1.19976	0.906696	1.38799	0.977564		1.36302	0.831193	0.778	0.660211	1.17101	0.960905	1.23735	0.945516
1.31263	0.77127	1.12824	0.724484	1.28505	0.882319	0.364287	0.390755		1.29157	0.748444	1.01246	0.831091	1.21589	0.809912	1.12266	0.947713
1.08278	0.680919	1.2493	0.894504	1.12576	0.897468	0.824522	0.723667		1.1795	0.73592	0.7148	0.639974	1.355	0.942244	1.11753	0.96428
1.32105	0.938203	1.15379	0.765345	1.07259	0.694784	0.431523	0.315888		0.950225	0.540147			1.1556	0.918127	1.10169	0.960792
1.33635	0.823174	0.80495	0.502302	0.960623	0.6138	1.01181	0.916855		0.96392	0.532236			1.1757	0.962899	1.12936	0.920947
1.05001	0.627063	1.25181	0.747329	1.18152	0.687714	0.593228	0.337468		1.36043	0.805253					1.03568	0.814447
1.17064	0.68992	1.08762	0.660211	0.928802	0.538104	0.501105	0.302976		1.3108	0.786599					1.11635	0.833583
1.21043	0.713478	1.11245	0.831091	1.30664	0.812978	1.05461	0.956336		1.33042	0.748038					1.17633	0.841785
1.27777	0.872038	1.18615	0.639974	1.24916	0.90955	1.10347	0.919997		1.57279	0.802308					1.27205	0.919945
1.26757	0.828778	1.1064	0.799916	1.22899	0.960663	1.06925	0.9319		1.48569	0.739408					1.35806	0.943546
0.894884	0.568314	1.11075	0.702587	1.20065	0.942041	1.02629	0.937292		1.25498	0.676438					1.33361	0.953295
0.999428	0.651789	0.988265	0.596062	1.24326	0.960658	0.466189	0.334362		1.34218	0.755001					1.2597	0.960905
1.03829	0.66132	1.16742	0.665453	1.32379	0.960794	1.06045	0.878385		1.36949	0.805825					1.02789	0.809912
1.20347	0.780664	1.192	0.696101	1.32455	0.942244	1.18338	0.877483		1.28756	0.893758					0.83104	0.591419
1.15802	0.698476	1.25383	0.771168	1.31502	0.918127	1.22386	0.928976		1.37199	0.908765					0.86745	0.7878
1.30014	0.819239	1.0472	0.620291	1.2054	0.962899	1.17908	0.925928		1.25662	0.922231					1.00028	0.799141
1.27461	0.803558	1.0656	0.594366	1.08339	0.943259	1.27812	0.93627		1.14525	0.941107					1.21239	0.890629
0.999883	0.59832			1.26764	0.910336	1.19371	0.850561		1.26198	0.892382					1.42569	0.947703
1.06337	0.657642			1.27392	0.872636	0.888251	0.719361		1.35514	0.754139					1.38545	0.918451
1.03971	0.677204			1.3149	0.904672	1.1192	0.899642		1.35605	0.792781					1.43743	0.93135
1.01926	0.690377			1.29901	0.84073	1.02518	0.924539		1.47418	0.774218					1.46863	0.953168
1.08631	0.648685			1.3662	0.888227	1.2589	0.945403		1.58628	0.796344					1.40887	0.953759
1.20315	0.73122			1.36749	0.893511	1.29099	0.959684		1.51736	0.832681					1.37738	0.951183
1.22986	0.757639			1.39743	0.917443	1.21409	0.952249		1.48717	0.904913					1.39403	0.959686
1.23746	0.847378			1.37397	0.832592	1.11152	0.943173		1.31146	0.954635					1.34459	0.96879
1.1969	0.82675			1.37823	0.842586	1.29107	0.902787		1.37037	0.967443					1.07545	0.917635
1.11296	0.748663			1.29319	0.91169	1.19278	0.797335		1.30314	0.967721					1.37902	0.893852
1.11577	0.744299			1.39516	0.918938	1.2076	0.849802		1.34809	0.960012					1.17884	0.9123
1.02924	0.695221			1.42988	0.921926	1.10164	0.686578		1.40287	0.863064					1.1913	0.839563
1.1896	0.850401			1.33908	0.946469	1.26491	0.939869		1.45311	0.93008					1.2977	0.87296
1.24473	0.940195			1.25207	0.980054	1.25605	0.929102		0.519488	0.331149					1.37825	0.919171
1.33894	0.915223			1.22827	0.976702	1.27811	0.781481		1.499	0.837743					1.33239	0.947394
1.35091	0.889925			1.26353	0.957398	1.30086	0.793653		1.51375	0.720541					1.08311	0.881949
1.29944	0.827164			1.22766	0.953858	1.29726	0.868527		1.39771	0.683772					1.16346	0.935419
1.2389	0.744896			1.26552	0.943502	1.0235	0.703507		1.35317	0.912334					1.33061	0.937056
1.41305	0.817832			1.20978	0.966662	1.243	0.878431		1.37565	0.903603					1.17207	0.820138
1.32591	0.775551			1.29947	0.927514	1.35388	0.927035		1.29984	0.630618					1.40889	0.925376
1.2694	0.754838			1.24905	0.808482	1.25574	0.819539		1.31326	0.757774					1.43399	0.907261
1.17404	0.691019			0.934399	0.539225	1.36431	0.922071		1.17758	0.722628					1.3981	0.931974
1.07349	0.632834			1.2819	0.741404	1.02398	0.971652		1.13734	0.704648					1.42739	0.955577
1.01263	0.602873			1.13911	0.664786	1.36599	0.93453		1.43897	0.694742					1.31866	0.9319
1.19342	0.747504			1.19735	0.735387	1.23077	0.948717		0.596774	0.35652					1.30359	0.773913
1.54853	0.938509			1.29901	0.912045	1.23022	0.972075		0.982608	0.861861					1.28673	0.767671
1.46186	0.896256			1.3368	0.926151	1.14887	0.952454		1.22658	0.874855					1.39566	0.813843
1.39059	0.897345			1.33634	0.939482	1.07598	0.968241		1.15454	0.900752					1.08853	0.872285
1.34561	0.792652			1.35744	0.95135	1.08543	0.972183		1.19292	0.721349					1.10484	0.923296
1.22839	0.708093			1.27325	0.91459	1.02372	0.980133		1.38892	0.972269					1.15257	0.930954
1.35072	0.798367			1.26397	0.899336	1.1597	0.982541		1.33547	0.967738					1.60594	0.940129
1.25821	0.773883			1.3059	0.936877	0.580095	0.321684		1.43566	0.818893					1.26563	0.943605
1.22521	0.748707			1.23288	0.969104	0.573136	0.310701		1.3016	0.864167					1.3718	0.727023
1.34592	0.808164					1.0429	0.925712		1.35639	0.892579					1.24928	0.961628
1.4265	0.906941					1.23195	0.944471		1.3302	0.966409					1.30627	0.95215
1.35973	0.880739					1.18994	0.967814		1.55369	0.960962					1.27453	0.972249
1.30019	0.878214					1.20373	0.959909		1.45053	0.953805					1.19555	0.977315
1.2858	0.944734					0.871374	0.910485		1.58991	0.919546					1.28218	0.972495
1.27616	0.938186					0.582172	0.309792		1.47182	0.923729					1.14614	0.980319
1.31193	0.943368					0.597573	0.388388		1.29753	0.92499					1.22585	0.943817
1.38496	0.93728					1.19043	0.913609		1.30972	0.847422					1.17839	0.964009
1.35781	0.965368					1.26061	0.93513		1.32156	0.926326					1.17253	0.910708
1.30442	0.937211					1.07351	0.931765		1.5246	0.9328					1.28724	0.932516
1.23008	0.879385					0.963663	0.913068		1.51908	0.922838					1.33572	0.953413
1.2524	0.824973					1.08514	0.800631		1.39315	0.921703					1.26202	0.965022
1.29913	0.916948					1.322	0.904859		1.36122	0.947553					1.20393	0.970421
1.36533	0.928985					1.24847	0.952156		1.43602	0.93262					1.35543	0.974732
1.50257	0.92501					1.35907	0.927171		1.40313	0.716523					1.30949	0.979322
1.2463	0.860459					1.13915	0.838151		1.13591	0.728338					1.27494	0.982519
1.13225	0.692528					1.05228	0.89686		1.11939	0.735181					1.27331	0.982241
1.52488	0.86582					0.509232	0.37464		1.17395	0.674832					1.33491	0.977574
1.58277	0.957132					1.06231	0.82215		1.12978	0.703838					1.05646	0.978687
1.19341	0.932359					1.11483	0.832927		1.1687	0.864122					0.83369	0.951506
1.23334	0.88673					0.953672	0.771984		1.38166	0.915223					1.09093	0.912155
1.31984	0.90727					0.966437	0.763062		1.20541	0.756863					1.15818	0.875665
1.08822	0.616208					0.927012	0.815136		1.23661	0.786353					1.22908	0.943175
1.19308	0.671099					0.581379	0.351604		1.39797	0.81074					1.22543	0.9559
1.24642	0.721706					1.15814	0.921266		1.53848	0.90355					1.11807	0.978504
1.2448	0.71036					1.2756	0.921153		1.59873	0.949358					1.28848	0.974567
						1.19677	0.77044		1.51769	0.950609					1.13868	0.966724
						1.25554	0.899781		1.35235	0.947312					1.11793	0.969142
						1.14409	0.840425		1.38494	0.904351					1.2676	0.910715
						1.16743	0.749205		1.58264	0.923697					1.20022	0.961686
						1.21476	0.854058		1.54486	0.915168					1.1312	0.948053
						1.25955	0.768594		1.36476	0.861422					1.20142	0.923012
						1.36261	0.839059		1.29505	0.768342					1.29347	0.925223
						1.35869	0.886798		1.23193	0.706559					1.33432	0.95629
						1.24826	0.960959		1.24203	0.711198					1.34344	0.970356
						1.49466	0.957751		1.27747	0.748067					1.36244	0.974813
						1.30965	0.902903		1.14407	0.714652					1.40548	0.978726
						1.34282	0.912274		1.48664	0.859524					1.19802	0.973748
						1.38344	0.941367		0.925882	0.564738					1.31742	0.979406
						1.37402	0.939127		1.37596	0.8962					1.21078	0.973699
						1.25929	0.937234		1.17019	0.711534					1.21542	0.974742
						1.3473	0.951219		1.15306	0.73035					1.25558	0.961134
						1.41196	0.95216		1.14226	0.720981					1.32745	0.963746
						1.26665	0.940357		1.29282	0.949566					1.29187	0.976414
						1.11083	0.945284		1.33481	0.827003					1.2381	0.964366
						1.26795	0.941448		1.28243	0.811887					1.29813	0.962617
						1.41573	0.945542		1.30629	0.854207					1.40744	0.945963
						1.34879	0.975321		1.52367	0.954643					1.29735	0.953316
						1.09138	0.948312		1.33765	0.8572					1.37427	0.972769
						0.953711	0.964888		1.21116	0.670708					1.08423	0.959522
						1.11914	0.892187		1.44718	0.898484					1.25863	0.969129
						1.40943	0.93284		1.38157	0.842352					1.28239	0.961666
						1.1528	0.924924		1.35021	0.805487					1.40648	0.950339
						1.16455	0.968323		1.39958	0.832537					1.4134	0.965904
						0.928483	0.87979		1.36475	0.831849					1.4194	0.968355
						1.08387	0.89899		1.31009	0.81841					1.41851	0.970331
						1.26016	0.940136		1.36768	0.877315					1.32284	0.951435
						1.35497	0.937153		1.35781	0.921548					1.42731	0.887231
						1.36791	0.936194		1.39912	0.960184					1.40711	0.934772
						1.40403	0.939082		1.28023	0.873519					1.39168	0.956857
						1.33926	0.954619		1.31106	0.796874					1.32276	0.96815
						1.35398	0.953302								1.35303	0.913091
						1.30968	0.969401								1.36254	0.893972
						1.08884	0.972963								1.41352	0.93211
						1.0517	0.903843								1.39573	0.953883
						1.20743	0.912641								1.29171	0.922932
						1.17442	0.902099								1.40911	0.899576
						1.1746	0.8216								1.37211	0.917699
						1.26483	0.880274								1.31023	0.932341
						1.29976	0.921403								1.21172	0.848274
						1.25688	0.953722								1.01231	0.864995
						1.10433	0.909698								1.33908	0.83851
						1.3442	0.959984								1.30719	0.875068
						1.24339	0.867995								1.32439	0.9341
						1.33786	0.91207								1.26213	0.859359
						1.37794	0.887238								1.23751	0.747611
						1.3705	0.930534								1.35693	0.881019
						1.42236	0.951262								1.41884	0.948602
						1.37725	0.972831								1.40282	0.949192
						1.33997	0.9425								1.42582	0.953353
						1.26934	0.931847								1.39863	0.961651
						1.28869	0.975382								1.30726	0.943384
						1.20683	0.87669								1.27469	0.958291
						1.1771	0.942498								1.30468	0.926295
						1.1189	0.963582								1.30317	0.965222
						1.19494	0.918318								1.27267	0.976194
						1.114	0.769888								1.28477	0.961366
						1.26551	0.934636								1.38629	0.922636
						1.19295	0.937157								1.11894	0.966096
						1.34443	0.893245								1.0297	0.667002
						1.35749	0.904021								1.16766	0.712298
						1.19003	0.94799								1.1887	0.714011
						1.06652	0.927995								1.15797	0.689298
						1.14473	0.925771								1.21951	0.750719
						1.10679	0.92204								1.32395	0.946751
						1.01289	0.957728								1.40202	0.935365
						1.09762	0.923669								1.11312	0.919075
						1.22002	0.840633								1.0929	0.932066
						1.31416	0.923025								1.12605	0.929262
						1.23537	0.947804								1.13361	0.890705
						1.26622	0.960508								1.07743	0.900342
						1.28468	0.974879								1.07269	0.91141
						1.12647	0.97142								1.23313	0.955309
						1.20728	0.968138								1.2513	0.971047
						1.21417	0.977239								1.13061	0.962974
						1.12878	0.910914								1.07771	0.96962
						1.00886	0.975043								0.917531	0.959945
						1.10035	0.96725								1.00307	0.953662
						1.12012	0.963401								1.20827	0.956924
						1.12176	0.930377								1.15206	0.960649
						1.2491	0.910287								1.04827	0.96767
						1.22908	0.914807								1.19214	0.967003
						1.1984	0.88476								1.32553	0.958337
						1.32315	0.924445								1.33353	0.9437
						1.28374	0.87387								1.23333	0.969745
						1.15553	0.96028								1.11502	0.96998
						1.27348	0.931639								1.33099	0.96061
						1.2634	0.944267								1.44826	0.967147
						1.38016	0.950998								1.31949	0.924075
						1.34449	0.955397								1.22872	0.9677
						1.25619	0.935271								1.15489	0.920616
						1.30406	0.941114								1.17954	0.915103
						1.024	0.864687								1.23164	0.881195
						1.06048	0.87732								1.19744	0.77052
						1.15309	0.841532								1.15209	0.787386
						1.38812	0.889132								1.16282	0.963001
						1.37798	0.892279								1.1732	0.954719
						1.35371	0.955768								1.22965	0.855968
						1.32062	0.969548								1.2852	0.840696
						1.30912	0.963798								1.02467	0.949002
						1.31112	0.921466								1.15698	0.920613
						1.36729	0.912379								1.21339	0.841793
						1.35913	0.963998								1.31611	0.933717
						1.36499	0.964411								1.27198	0.832855
						1.27375	0.96132								1.26266	0.845865
						1.27343	0.972319								1.37522	0.889759
						1.31776	0.931448								1.33015	0.953331
						1.28286	0.955748								1.29029	0.818062
						1.28197	0.947383								1.34551	0.819182
						1.31708	0.949898								1.08206	0.690704
						1.34598	0.974335								1.02358	0.455997
						1.32847	0.963245								1.15177	0.724776
						1.3255	0.906288								1.16592	0.738457
						1.07906	0.835673								1.23511	0.829089
						1.37094	0.964753								1.11192	0.786225
						1.16461	0.868818								1.1582	0.597849
						0.99221	0.880965								1.23539	0.732323
						1.20194	0.881332								1.38159	0.901819
						1.11268	0.744591								1.30223	0.888434
						1.10959	0.71864								1.25974	0.931379
						1.27431	0.921063								1.40381	0.912359
						1.19129	0.823218								1.45017	0.90285
						1.25583	0.823182								1.44021	0.933654
						1.27955	0.890777								1.22105	0.972726
						1.33664	0.955795								1.28092	0.958721
						1.36952	0.924308								1.53383	0.903256
						1.34622	0.94324								1.41568	0.881894
						1.33168	0.965734								1.51018	0.93186
						1.26772	0.929265								1.42822	0.956177
						1.27322	0.957771								1.30359	0.947568
						1.21823	0.944238								1.25632	0.956247
						1.23614	0.960105								1.3246	0.969233
						1.21092	0.979645								1.26407	0.907134
						1.05074	0.983744								1.3113	0.945767
						1.20961	0.954418								1.25327	0.978728
						1.21205	0.93429								1.2592	0.941327
						0.971905	0.597036								1.27077	0.971381
						1.0972	0.685785								1.31305	0.972226
						1.08098	0.670906								1.28881	0.977853
						1.03532	0.628551								1.20584	0.980345
						1.15563	0.723121								1.27382	0.971059
						1.21679	0.806441								1.38037	0.936399
						1.32612	0.91474								1.39497	0.928437
						1.31247	0.920718								1.31644	0.938823
						1.06425	0.879468								1.43993	0.957224
						1.019	0.897362								1.46881	0.949096
						1.21939	0.888018								1.39789	0.962042
						0.940179	0.785616								1.33664	0.966157
						0.886795	0.751644								1.34241	0.958483
						1.13963	0.910014
						1.16406	0.964139
						1.07926	0.944143
						1.10126	0.942424
						0.914497	0.925047
						0.915232	0.957739
						1.07915	0.932648
						1.19031	0.939796
						1.15028	0.936936
						1.22749	0.941914
						1.26714	0.934024
						1.14169	0.951036
						1.24789	0.953286
						1.27924	0.937823
						1.26642	0.929288
						1.28103	0.925141
						1.02244	0.90845
						1.06093	0.938206
						1.28432	0.90698
						1.25234	0.772858
						1.38956	0.889101
						1.04664	0.69647
						1.23705	0.928351
						1.27475	0.938303
						1.31476	0.969403
						1.23848	0.975329
						1.30036	0.964335
						1.33702	0.927706
						1.35235	0.937604
						1.36619	0.939643
						1.37402	0.934609
						1.36987	0.941026
						1.28061	0.912653
						1.27287	0.918353
						1.09747	0.832981
						1.21582	0.923355

## Sheet: FMF vs SSA
Relationship between fine mode fraction (FMF) and single scattering albedo (SSA)
			Data source: AERONET (https://aeronet.gsfc.nasa.gov/cgi-bin/webtool_inv_v3)
Time: 12:00:00 pm, Location: Dhaka (23.72839, 90.39819), Bhola (22.22668, 90.75642)
Dhaka (2012-2019)									Bhola (2013-2019)
Pre-monsoon		Monsoon		Post-monsoon		Winter			Pre-monsoon		Monsoon		Post-monsoon		Winter
SSA	FMF	SSA	FMF	SSA	FMF	SSA	FMF		SSA	FMF	SSA	FMF	SSA	FMF	SSA	FMF
0.8798	0.781354	0.92545	0.489187	0.844533	0.918127	0.81125	0.93118		0.940667	0.804223	0.90465	0.606304	0.9748	0.786043	0.7904	0.863465
0.877933	0.875676	0.8977	0.42095	0.8173	0.84073	0.8685	0.969827		0.9373	0.78558	0.9406	0.580851	0.96355	0.641628	0.917667	0.966333
0.860967	0.897099	0.930133	0.588848	0.850567	0.888227	0.86875	0.955144		0.9365	0.781246	0.9337	0.463606	0.969075	0.858449	0.881967	0.932668
0.853033	0.789088	0.9473	0.341508	0.8612	0.893511	0.906967	0.977825		0.9644	0.776136	0.9381	0.470244	0.908986	0.716166	0.8816	0.917101
0.88315	0.831564	0.9653	0.892598	0.80105	0.832592	0.90332	0.941766		0.9807	0.38023	0.97635	0.859307	0.907138	0.802389	0.88385	0.940368
0.9015	0.870294	0.943	0.711544	0.8404	0.918938	0.8943	0.914446		0.9195	0.606			0.9248	0.908442	0.8304	0.929372
0.9014	0.782154	0.9254	0.662058	0.85845	0.953858	0.91395	0.920435		0.889586	0.764478			0.974225	0.972304	0.922575	0.977301
0.9138	0.897442	0.903	0.529278	0.837575	0.943502	0.8522	0.79483		0.89785	0.820131			0.95274	0.953872	0.94365	0.982377
0.8508	0.602588	0.9406	0.35543	0.8406	0.912045	0.9068	0.887263		0.9305	0.837633			0.948725	0.963718	0.919967	0.975865
0.83265	0.60248	0.9607	0.863105	0.834	0.926151	0.8804	0.9303		0.89675	0.742913			0.92274	0.971488	0.8857	0.956399
0.83645	0.762231	0.91155	0.62074	0.8358	0.939482	0.919417	0.973029		0.920475	0.831193			0.923425	0.943786	0.92555	0.980151
0.9419	0.789263	0.8932	0.649768	0.8744	0.95135	0.902667	0.974088		0.897875	0.748444			0.924075	0.980167	0.95825	0.979787
0.9178	0.550643	0.9301	0.685274	0.8202	0.91459	0.93142	0.969402		0.9049	0.73592			0.93052	0.980579	0.956233	0.970243
0.89512	0.472005	0.9356	0.624427	0.83265	0.899336	0.91872	0.960412		0.9076	0.640147			0.9095	0.972368	0.918671	0.964933
0.9124	0.685442	0.9414	0.659437	0.81855	0.936877	0.9196	0.946332		0.911267	0.632236			0.916838	0.964694	0.905171	0.952742
0.89425	0.56873	0.9047	0.887499	0.844433	0.969104	0.933	0.951135		0.9388	0.591115			0.90875	0.975773	0.9154	0.963557
0.8988	0.616652	0.9827	0.876964	0.9631	0.969227	0.942925	0.963698		0.92415	0.547319			0.904475	0.940823	0.90044	0.977668
0.8918	0.678626			0.9426	0.892001	0.902833	0.944757		0.89805	0.802308			0.929712	0.965366	0.89648	0.967397
0.9057	0.645824			0.877625	0.945426	0.9362	0.956996		0.856267	0.739408			0.893875	0.956919	0.9199	0.969055
0.887475	0.464245			0.92435	0.939336	0.93496	0.947547		0.8516	0.755001			0.9141	0.943253	0.909517	0.967513
0.91125	0.633871			0.8967	0.869619	0.854833	0.808817		0.8698	0.908765			0.8878	0.964649	0.9291	0.97405
0.881225	0.870514			0.851125	0.887191	0.892167	0.978825		0.9446	0.416032			0.886143	0.961791	0.9326	0.979578
0.91752	0.898713			0.83255	0.890732	0.880643	0.969714		0.9155	0.606598			0.886186	0.952562	0.881986	0.96975
0.9056	0.896432			0.850325	0.917356	0.869475	0.962962		0.9156	0.605709			0.913456	0.979644	0.867329	0.956785
0.96358	0.895196			0.879933	0.862832	0.907325	0.978616		0.9482	0.633069			0.9182	0.97369	0.890057	0.960573
0.927633	0.810876			0.8574	0.94059	0.88995	0.963622		0.95885	0.836			0.9469	0.955675	0.8977	0.975104
0.92545	0.573027			0.92015	0.955709	0.9	0.881897		0.9291	0.429405			0.9205	0.952452	0.8924	0.974936
0.9208	0.581126			0.8845	0.885238	0.8876	0.902454		0.92228	0.970331			0.87065	0.941038	0.87065	0.946062
0.8552	0.547909			0.877733	0.869687	0.9108	0.963136		0.918875	0.972269			0.84205	0.880459	0.838167	0.871801
0.9031	0.648742			0.88155	0.934296	0.883867	0.917469		0.9261	0.967738			0.86056	0.936444	0.8614	0.867345
0.9271	0.621808			0.88095	0.959029	0.87615	0.3767		0.93475	0.892579			0.8746	0.947314	0.85495	0.866534
0.93108	0.878796			0.9065	0.965804	0.882725	0.929742		0.94	0.966409			0.8598	0.861137	0.850367	0.911885
0.9132	0.729917			0.873033	0.956416	0.8477	0.912233		0.929475	0.960962			0.908833	0.965465	0.8567	0.886563
0.872786	0.674823			0.8672	0.958373	0.857025	0.947097		0.93025	0.919546			0.87126	0.959355	0.8984	0.946819
0.89455	0.694794			0.893	0.968389	0.86545	0.95519		0.901571	0.847422			0.855371	0.935158	0.879625	0.954279
0.8425	0.713478			0.90005	0.972071	0.84474	0.93649		0.90132	0.926326			0.89548	0.971645	0.8795	0.959053
0.911333	0.872038			0.8688	0.941119	0.8654	0.939585		0.9115	0.9328			0.883675	0.974079	0.888375	0.954854
0.94145	0.828778			0.8716	0.961535	0.8619	0.304602		0.9291	0.922838			0.84265	0.96654	0.9151	0.972127
0.84916	0.568314			0.87175	0.973672	0.912	0.976525		0.916733	0.921703			0.86066	0.965726	0.899767	0.972996
0.8368	0.651789			0.888917	0.974962	0.9183	0.975078		0.954367	0.947553			0.826	0.903018	0.9042	0.976066
0.8688	0.66132			0.882025	0.973999	0.90425	0.960399		0.9352	0.716523			0.8597	0.899256	0.90115	0.965274
0.9124	0.780664			0.864	0.97599	0.912825	0.976999		0.92735	0.728338			0.870475	0.954921	0.91105	0.944819
0.9076	0.698476			0.9383	0.977637	0.8956	0.969638		0.933	0.735181			0.8262	0.891906	0.896925	0.971088
0.89825	0.819239			0.9213	0.948517	0.864075	0.937604		0.870325	0.674832			0.872467	0.897412	0.90495	0.958669
0.8866	0.803558			0.9514	0.972349	0.870533	0.945902		0.856314	0.703838			0.884425	0.961814	0.9297	0.974785
0.885975	0.59832			0.9203	0.960728	0.86148	0.884038		0.89856	0.864122			0.876433	0.955965	0.911967	0.970049
0.92025	0.677204			0.93625	0.968184	0.883667	0.93389		0.9577	0.949137			0.904	0.972341	0.90975	0.973516
0.9113	0.690377			0.92965	0.956369	0.876433	0.930808		0.9167	0.763495			0.89175	0.971996	0.89508	0.953539
0.8846	0.648685			0.914867	0.951617	0.841267	0.902021		0.8989	0.697934			0.89515	0.96969	0.88305	0.924472
0.9171	0.73122			0.916833	0.971501	0.885033	0.761245		0.9125	0.582105			0.86705	0.9009	0.90958	0.959583
0.91935	0.757639			0.868	0.933253	0.83475	0.839875		0.92585	0.544703			0.902833	0.955	0.887457	0.929249
0.8807	0.82675			0.8071	0.895878	0.876533	0.72225		0.9095	0.528768			0.90198	0.925674	0.89285	0.933765
0.8857	0.570349			0.840233	0.927036	0.85252	0.81946		0.945133	0.776642			0.92912	0.900995	0.8514	0.915031
0.9079	0.658937			0.8381	0.949503	0.83815	0.84153		0.934433	0.730249			0.9211	0.946167	0.863867	0.924147
0.9295	0.710072			0.876375	0.95925	0.8886	0.901538		0.9589	0.761176			0.902043	0.952339	0.866117	0.957151
0.8674	0.603419			0.96025	0.977812	0.8948	0.904304		0.9384	0.758127			0.897533	0.93419	0.890925	0.978042
0.9138	0.820034			0.902367	0.96089	0.88895	0.951094		0.9811	0.687905			0.9013	0.962555	0.868683	0.938313
0.88002	0.537459			0.8995	0.951984	0.882375	0.93189		0.9742	0.669162			0.888767	0.968689	0.888325	0.922654
0.9148	0.627387			0.889475	0.916626	0.8863	0.961706		0.9525	0.761676			0.9047	0.967615	0.876683	0.941311
0.9263	0.824473			0.9392	0.944308	0.8743	0.971461		0.9924	0.712298			0.893825	0.973182	0.896	0.975223
0.9195	0.548754			0.90145	0.941568	0.909225	0.974233		0.96748	0.813894			0.906275	0.946423	0.8897	0.963585
0.9368	0.63784			0.9079	0.960943	0.92055	0.973484		0.9778	0.906331			0.8853	0.848451	0.9027	0.940883
0.9534	0.621795			0.873586	0.943716	0.909117	0.976885		0.9701	0.681918			0.90075	0.89527	0.915925	0.945892
0.948267	0.675197			0.86865	0.932232	0.909175	0.976592		0.9523	0.372					0.911875	0.962301
0.95	0.754026			0.8839	0.945319	0.8909	0.977026		0.9637	0.391652					0.86885	0.950247
0.9522	0.722518			0.827633	0.877653	0.887725	0.976964		0.85164	0.756863					0.867143	0.93549
0.95325	0.695316			0.8274	0.866023	0.915967	0.976454		0.8835	0.786353					0.893071	0.968049
0.900175	0.915223			0.8218	0.904387	0.89935	0.977268		0.9033	0.81074					0.915775	0.973292
0.8982	0.889925			0.8908	0.963096	0.8762	0.96953		0.95175	0.950609					0.902229	0.97505
0.8819	0.827164			0.893975	0.971941	0.8615	0.947589		0.9412	0.923697					0.909143	0.96412
0.856325	0.744896			0.915	0.970004	0.869333	0.913952		0.9619	0.915168					0.888717	0.932576
0.859833	0.817832			0.818633	0.768842	0.8917	0.955475		0.943967	0.861422					0.893733	0.965369
0.8366	0.775551			0.832367	0.856352	0.905975	0.938451		0.9178	0.768342					0.88315	0.920009
0.8581	0.754838			0.801933	0.837526	0.866167	0.910122		0.892622	0.706559					0.9214	0.945516
0.86985	0.691019			0.8435	0.879479	0.8632	0.911144		0.874717	0.711198					0.932433	0.947713
0.845725	0.632834			0.889575	0.92417	0.861	0.878527		0.8594	0.748067					0.941	0.96428
0.8805	0.896256			0.840217	0.878165	0.8364	0.88983		0.9223	0.714652					0.9393	0.960792
0.93405	0.897345			0.8875	0.702366	0.9039	0.888296		0.9705	0.859524					0.9026	0.7878
0.871233	0.792652			0.7768	0.869947	0.9386	0.978435		0.92624	0.564738					0.8939	0.890629
0.818367	0.798367			0.9078	0.965602	0.9033	0.96176		0.92262	0.711534					0.89205	0.947703
0.833325	0.773883			0.914	0.893522	0.8943	0.940132		0.92	0.73035					0.9017	0.918451
0.82925	0.748707			0.8691	0.880982	0.886329	0.932015		0.90148	0.720981					0.9187	0.953168
0.8124	0.808164			0.858967	0.905698	0.892233	0.971132		0.93065	0.655022					0.8936	0.953759
0.895775	0.906941			0.86565	0.956819	0.8725	0.585774		0.9344	0.730879					0.9257	0.959686
0.883286	0.880739			0.87	0.957497	0.8975	0.921036		0.9471	0.719298					0.922	0.917635
0.9126	0.878214			0.86235	0.949637	0.86875	0.922242		0.9413	0.798701					0.8073	0.839563
0.9593	0.944734			0.85402	0.944402	0.90198	0.96761		0.9495	0.832064					0.90295	0.937056
0.921	0.938186			0.87214	0.963249	0.890733	0.967485		0.9273	0.620778					0.9046	0.907261
0.9267	0.738518			0.8247	0.938866	0.8546	0.934383		0.9353	0.689996					0.9378	0.955577
0.8769	0.587798			0.8178	0.878964	0.8553	0.840902		0.90645	0.60997					0.9088	0.773913
0.9064	0.632729			0.8279	0.90263	0.8472	0.861031		0.878975	0.604351					0.88174	0.961628
0.8918	0.943368			0.796233	0.863239	0.8221	0.790091		0.889	0.676573					0.874786	0.95215
0.9086	0.965368			0.8535	0.895077	0.878	0.723667		0.920825	0.769553					0.890575	0.972249
0.8827	0.937211			0.84875	0.881738	0.8937	0.916855		0.918143	0.713382					0.893517	0.977315
0.907767	0.879385			0.832867	0.885535	0.873	0.937468		0.934617	0.678661					0.90075	0.972495
0.903	0.928985			0.8314	0.890832	0.84095	0.902976		0.92555	0.558291					0.90015	0.980319
0.9664	0.936273			0.84235	0.881051	0.8506	0.956336		0.9417	0.6559					0.917	0.943817
0.878467	0.70637			0.874	0.929127	0.8337	0.919997		0.944643	0.7197					0.89715	0.964009
0.84798	0.460255			0.89732	0.938505	0.8543	0.9319		0.948925	0.672766					0.8798	0.932516
0.8129	0.539255			0.863433	0.911557	0.837	0.937292		0.9497	0.732093					0.906425	0.953413
0.840271	0.633315			0.87665	0.848367	0.85875	0.934362		0.935	0.647631					0.91584	0.965022
0.834086	0.714098			0.858167	0.931653	0.82555	0.877483		0.9394	0.70259					0.90588	0.970421
0.897	0.817248			0.9022	0.792216	0.882533	0.928976		0.9555	0.611335					0.9366	0.974732
0.94555	0.90667			0.91225	0.33287	0.92705	0.925928		0.928133	0.585477					0.919388	0.979322
0.9186	0.861823			0.9237	0.978511	0.90195	0.93627		0.9601	0.716779					0.925217	0.982519
0.8917	0.74647			0.9326	0.938555	0.8651	0.850561		0.95	0.795309					0.924917	0.982241
0.903533	0.680657			0.909	0.912533	0.86805	0.719361		0.9466	0.639805					0.920767	0.977574
0.872175	0.579804			0.9361	0.979075	0.9168	0.924539		0.947633	0.701702					0.939683	0.978687
0.8801	0.688973			0.9406	0.941241	0.9035	0.939869		0.96555	0.809951					0.916667	0.951506
0.8805	0.653008			0.833	0.787611	0.8915	0.378431		0.97295	0.692495					0.9013	0.912155
0.85415	0.478223			0.90325	0.962839	0.884533	0.819539		0.9334	0.674681					0.9264	0.875665
0.9048	0.340094			0.882467	0.926846	0.9247	0.971652		0.9687	0.569331					0.913367	0.943175
0.9087	0.684228			0.90056	0.956848	0.8715	0.93453		0.97335	0.66157					0.920367	0.9559
0.8834	0.546391			0.9012	0.957302	0.8815	0.898034		0.9596	0.638933					0.915133	0.974567
0.927767	0.932757			0.895075	0.974694	0.9205	0.933732		0.94955	0.617382					0.94355	0.966724
0.9518	0.547564			0.89558	0.975458	0.88845	0.868457		0.95775	0.633016					0.9537	0.969142
0.89555	0.360926			0.881183	0.971542	0.8534	0.8387		0.958267	0.679					0.9156	0.910715
0.9473	0.468324			0.883912	0.974489	0.881367	0.727043		0.960086	0.595215					0.9127	0.948053
0.940967	0.539419			0.87028	0.960002	0.902775	0.727088		0.955533	0.589496					0.893367	0.923012
0.9381	0.815097			0.8954	0.980091	0.87295	0.724455		0.9499	0.745927					0.896287	0.925223
0.94	0.755482			0.8963	0.981867	0.869575	0.698425		0.93386	0.827003					0.897257	0.95629
0.8885	0.67918			0.865943	0.955684	0.889043	0.948717		0.9268	0.811887					0.90575	0.970356
0.91845	0.387935			0.9232	0.920763	0.926417	0.972075		0.92732	0.854207					0.93705	0.974813
0.91665	0.693522			0.9413	0.353153	0.94085	0.952454		0.91625	0.954643					0.911475	0.978726
0.9127	0.636246			0.9691	0.978956	0.942225	0.968241		0.8734	0.8572					0.92505	0.973748
0.9084	0.770792			0.9353	0.96587	0.93908	0.972183		0.869457	0.898484					0.9647	0.979406
0.90105	0.78309			0.9202	0.972983	0.94685	0.982541		0.88586	0.842352					0.93635	0.973699
0.9202	0.574462			0.8653	0.949235	0.893833	0.921684		0.8792	0.805487					0.9307	0.961134
0.91695	0.673598			0.8597	0.950331	0.90715	0.910701		0.9254	0.832537					0.924737	0.963746
0.9226	0.653232			0.9082	0.910416	0.900575	0.925712		0.9114	0.831849					0.926	0.976414
0.91295	0.927099			0.8932	0.924516	0.882617	0.944471		0.9085	0.81841					0.915587	0.964366
0.8981	0.820209			0.889	0.92619	0.913733	0.959909		0.93126	0.921548					0.925625	0.962617
0.89864	0.731867					0.92105	0.910485		0.951733	0.960184					0.9446	0.945963
0.919025	0.798987					0.905	0.809792		0.912025	0.873519					0.9207	0.953316
0.8858	0.742723					0.8861	0.913609		0.86648	0.796874					0.9615	0.959522
0.9109	0.721179					0.9007	0.93513		0.88494	0.885377					0.9444	0.950339
0.9298	0.782314					0.928438	0.931765		0.90754	0.909103					0.929675	0.968355
0.9579	0.924715					0.900467	0.913068		0.91592	0.921617					0.88655	0.956857
0.928825	0.805389					0.8368	0.800631		0.92602	0.942806					0.8772	0.96815
0.933725	0.83369					0.869925	0.904859		0.930975	0.922805					0.80725	0.913091
0.9286	0.793229					0.90625	0.952156		0.9351	0.949899					0.872	0.953883
0.943875	0.755822					0.9294	0.927171		0.9259	0.879683					0.852433	0.922932
0.8903	0.794467					0.922783	0.838151		0.926133	0.882859					0.8835	0.899576
0.9045	0.894497					0.8877	0.82215		0.919	0.719722					0.8809	0.917699
0.9021	0.829129					0.8711	0.771984		0.9175	0.742486					0.9051	0.932341
0.936725	0.885684					0.854733	0.763062		0.912	0.826855					0.8781	0.848274
0.9525	0.860437					0.86665	0.815136		0.90166	0.733541					0.8859	0.9341
0.9308	0.452441					0.946767	0.851604		0.9067	0.927394					0.85335	0.859359
0.954	0.616079					0.938033	0.921266		0.916767	0.926299					0.884925	0.881019
0.9163	0.686579					0.924467	0.921153		0.9311	0.79278					0.889833	0.949192
0.9754	0.76979					0.876633	0.77044		0.95565	0.879791					0.9167	0.953353
0.9899	0.664688					0.90555	0.899781		0.9636	0.89237					0.912375	0.961651
0.9047	0.362163					0.91185	0.840425		0.952	0.876718					0.900767	0.943384
						0.8981	0.749205		0.95592	0.812346					0.87475	0.958291
						0.9149	0.854058		0.9606	0.832393					0.871025	0.926295
						0.891667	0.768594		0.952475	0.813945					0.884467	0.965222
						0.91225	0.839059		0.9614	0.772946					0.857483	0.667002
						0.902483	0.886798		0.9582	0.698783					0.858875	0.712298
						0.9383	0.957751		0.930533	0.609636					0.846975	0.714011
						0.89294	0.902903		0.937925	0.585354					0.864425	0.689298
						0.900925	0.912274		0.92575	0.419876					0.86114	0.750719
						0.909033	0.941367		0.9716	0.374513					0.91785	0.935365
						0.87985	0.939127		0.916825	0.525407					0.90814	0.919075
						0.9101	0.937234		0.917988	0.606497					0.902	0.932066
						0.914325	0.951219		0.93505	0.58143					0.889575	0.929262
						0.93838	0.95216		0.9474	0.575879					0.8992	0.890705
						0.954167	0.940357		0.9509	0.369536					0.922317	0.900342
						0.9376	0.945284		0.9318	0.487194					0.88265	0.91141
						0.9354	0.375321		0.9783	0.60078					0.90855	0.955309
						0.94278	0.948312		0.94725	0.622867					0.9168	0.971047
						0.94615	0.964888		0.975	0.614777					0.9059	0.962974
						0.8549	0.924924		0.9601	0.801229					0.9294	0.96962
						0.8715	0.87979		0.9476	0.527031					0.9302	0.959945
						0.8558	0.89899		0.9488	0.476629					0.9295	0.953662
						0.86796	0.940136		0.956	0.614877					0.902	0.956924
						0.85765	0.937153		0.9575	0.633516					0.9042	0.960649
						0.9128	0.936194		0.9587	0.727114					0.9031	0.96767
						0.892533	0.954619		0.938	0.683033					0.9077	0.967003
						0.893233	0.953302		0.929025	0.798419					0.8952	0.958337
						0.92265	0.969401		0.89355	0.825288					0.8914	0.9437
						0.9251	0.903843		0.9727	0.760005					0.88895	0.969745
						0.8967	0.912641		0.9464	0.891089					0.905833	0.96998
						0.854125	0.902099		0.917125	0.891411					0.881433	0.96061
						0.8217	0.8216		0.901533	0.776279					0.935767	0.967147
						0.855533	0.880274		0.9654	0.926128					0.901	0.924075
						0.9046	0.921403		0.949067	0.861991					0.927633	0.9677
						0.8847	0.953722		0.959233	0.795729					0.9245	0.920616
						0.89685	0.959984		0.926825	0.826135					0.8962	0.915103
						0.8674	0.887238		0.9027	0.807144					0.878475	0.881195
						0.879075	0.930534		0.90756	0.82358					0.909725	0.77052
						0.92728	0.951262		0.910767	0.835682					0.89764	0.787386
						0.9287	0.972831		0.927975	0.915908					0.916633	0.963001
						0.904171	0.9425		0.9663	0.916843					0.9053	0.954719
						0.891375	0.931847		0.9509	0.873402					0.912233	0.855968
						0.9542	0.975382		0.93715	0.889739					0.9187	0.840696
						0.91115	0.87669		0.94155	0.827998					0.9355	0.845865
						0.90928	0.942498		0.8858	0.670089					0.92885	0.953331
						0.918767	0.963582		0.851711	0.582511					0.887167	0.818062
						0.906575	0.918318		0.889967	0.56886					0.89895	0.819182
						0.87704	0.769888		0.89404	0.700664					0.9075	0.690704
						0.9136	0.934636		0.885022	0.699955					0.9001	0.659972
						0.899667	0.937157		0.913857	0.826459					0.8991	0.724776
						0.9104	0.893245		0.93162	0.811204					0.924033	0.738457
						0.8913	0.904021		0.94725	0.8806					0.935833	0.829089
						0.8555	0.94799		0.936567	0.740449					0.922133	0.786225
						0.8988	0.925771		0.92185	0.764334					0.9339	0.697849
						0.906233	0.957728		0.93775	0.792129					0.9237	0.732323
						0.899533	0.923669		0.961	0.781115					0.9556	0.901819
						0.870113	0.840633		0.94355	0.74033					0.91345	0.888434
						0.878733	0.923025		0.937325	0.762806					0.925167	0.931379
						0.8776	0.960508		0.918557	0.689408					0.8585	0.912359
						0.8892	0.97142		0.9221	0.639427					0.843325	0.90285
						0.921533	0.968138		0.944233	0.764757					0.842425	0.933654
						0.9335	0.977239		0.9229	0.803988					0.884167	0.972726
						0.88164	0.910914		0.9026	0.778174					0.8596	0.958721
						0.9399	0.975043		0.914033	0.819123					0.8557	0.93186
						0.9275	0.96725								0.906625	0.956177
						0.895867	0.963401								0.9046	0.947568
						0.902425	0.930377								0.9032	0.956247
						0.8558	0.910287								0.891029	0.969233
						0.9123	0.914807								0.841	0.907134
						0.9027	0.88476								0.8913	0.945767
						0.882075	0.924445								0.922471	0.978728
						0.8815	0.87387								0.884933	0.941327
						0.9182	0.96028								0.891625	0.971381
						0.9069	0.944267								0.887783	0.972226
						0.9207	0.950998								0.9022	0.977853
						0.9252	0.955397								0.894475	0.980345
						0.884667	0.935271								0.89875	0.971059
						0.900125	0.941114								0.87445	0.936399
						0.9003	0.864687								0.8599	0.928437
						0.91368	0.87732								0.8613	0.938823
						0.9076	0.841532								0.89435	0.957224
						0.8731	0.889132								0.905367	0.949096
						0.88122	0.892279								0.8885	0.962042
						0.91385	0.955768								0.9047	0.966157
						0.916683	0.969548								0.9141	0.958483
						0.91335	0.963798								0.89608	0.905552
						0.906725	0.921466								0.879225	0.941993
						0.82505	0.912379								0.859667	0.931393
						0.8869	0.963998								0.84355	0.944184
						0.87264	0.964411								0.860387	0.920837
						0.863367	0.96132								0.874511	0.925494
						0.87406	0.972319								0.85536	0.905971
						0.836333	0.931448								0.864812	0.933781
						0.87955	0.947383								0.882887	0.950026
						0.8643	0.949898								0.894743	0.956243
						0.895357	0.974335								0.90755	0.96161
						0.8761	0.963245								0.89515	0.94796
						0.835133	0.906288								0.89285	0.891262
						0.88608	0.964753								0.863829	0.897608
						0.883325	0.823218								0.874133	0.911862
						0.865	0.823182								0.874617	0.923438
						0.88855	0.890777								0.95275	0.973309
						0.92705	0.955795								0.961475	0.976803
						0.91145	0.924308								0.936075	0.970015
						0.9224	0.94324								0.935	0.955233
						0.92475	0.965734								0.931275	0.91828
						0.9029	0.929265								0.9672	0.904066
						0.88445	0.957771								0.921183	0.918356
						0.8797	0.944238
						0.8761	0.960105
						0.9202	0.979645
						0.8278	0.597036
						0.8332	0.670906
						0.8562	0.628551
						0.8625	0.806441
						0.88562	0.920718
						0.87984	0.879468
						0.8682	0.897362
						0.864575	0.888018
						0.93	0.35616
						0.8421	0.751644
						0.882633	0.910014
						0.902775	0.964139
						0.8952	0.944143
						0.89495	0.942424
						0.91635	0.925047
						0.9183	0.957739
						0.88075	0.932648
						0.88828	0.939796
						0.863	0.936936
						0.8792	0.934024
						0.88445	0.951036
						0.878567	0.953286
						0.87498	0.937823
						0.855475	0.929288
						0.8922	0.925141
						0.9037	0.90845
						0.8494	0.772858
						0.877567	0.889101
						0.8795	0.938303
						0.888575	0.969403
						0.889667	0.975329
						0.89425	0.964335
						0.871075	0.927706
						0.8518	0.937604
						0.8665	0.939643
						0.88562	0.934609
						0.89375	0.941026
						0.8643	0.912653
						0.8661	0.901659
						0.8762	0.921427
						0.91218	0.917104
						0.9169	0.894039

## Sheet:  Seasonal variations
	Seasonal variations of the aerosol optical parameters
	Data source: AERONET (https://aeronet.gsfc.nasa.gov/cgi-bin/webtool_inv_v3)
Dhaka						Bhola
	Pre-monsoon	Monsoon	Post-monsoon	Winter			Pre-monsoon	Monsoon	Post-monsoon	Winter
AAE	1.44514	1.3	1.31	1.25		AAE	1.36	0.981	1.139	1.2
AE	1.19964	1.06	1.241	1.201		AE	1.33	0.822922	1.171	1.262
EAE	1.171	1.045	1.31	1.19		EAE	1.205	1.001	1.34	1.261
FMF	0.752	0.69	0.871	0.911		FMF	0.74	0.549	0.871	0.919
RRI	1.44	1.424	1.473	1.471		RRI	1.461	1.46	1.453	1.472
SSA	0.901	0.935	0.88	0.89		SSA	0.932	0.95	0.898	0.901

## Sheet: MODIS fire point
Number of MODIS fire points over Bangladesh during winter and pre-monsoon season (2018-19)
	Data source: FIRMS (https://firms.modaps.eosdis.nasa.gov/country/)
Winter							Pre-monsoon
Date	Average number of fire points						Date	Average number of fire points
2018-12-01	7.05						2019-03-01	14.82
2018-12-02	9.625						2019-03-03	42.0571
2018-12-03	10						2019-03-04	65.1667
2018-12-04	11.8						2019-03-05	75.1875
2018-12-06	14						2019-03-06	30.425
2018-12-07	11.1333						2019-03-07	13.275
2018-12-09	7.53333						2019-03-08	4.7
2018-12-10	44.1						2019-03-09	13.8
2018-12-11	6.15						2019-03-10	41.0333
2018-12-12	7.16667						2019-03-11	66.5733
2018-12-13	12.88						2019-03-12	21.7067
2018-12-15	21.1667						2019-03-13	145.976
2018-12-21	1.5						2019-03-14	50.8667
2018-12-22	7.6						2019-03-15	8.66667
2018-12-25	10.75						2019-03-16	83.4
2018-12-27	7.1						2019-03-17	17.9
2018-12-29	7.24						2019-03-18	57.2211
2018-12-30	16.95						2019-03-19	68.89
2018-12-31	12.6						2019-03-20	112.864
2019-01-01	8.3						2019-03-21	31.1966
2019-01-03	6.03333						2019-03-22	74.3316
2019-01-05	6.57143						2019-03-23	35.4691
2019-01-07	15.3						2019-03-24	135.517
2019-01-08	11.725						2019-03-25	35.831
2019-01-09	10.25						2019-03-26	86.2263
2019-01-10	4.2						2019-03-27	57.6234
2019-01-12	10.8						2019-03-28	49.7338
2019-01-13	4.7						2019-03-29	92.3677
2019-01-14	6.2						2019-03-30	33.7536
2019-01-16	6.4						2019-03-31	42.6667
2019-01-17	5.6						2019-04-01	30.514
2019-01-19	8.96667						2019-04-02	54.1571
2019-01-20	4						2019-04-03	46.4743
2019-01-21	13.5						2019-04-04	25.9625
2019-01-23	7.4						2019-04-05	46.6455
2019-01-24	9						2019-04-06	43.6944
2019-01-27	32.9						2019-04-07	40.5625
2019-01-29	4.9						2019-04-08	16.2
2019-01-30	9.6						2019-04-09	24.5
2019-02-02	11.8						2019-04-10	16.3857
2019-02-03	46						2019-04-11	62.825
2019-02-04	7.225						2019-04-12	28.728
2019-02-05	4.6						2019-04-13	33.6796
2019-02-08	19.4						2019-04-14	64.8895
2019-02-09	14.1						2019-04-15	38.3371
2019-02-10	10.6						2019-04-16	23.9444
2019-02-11	9.88						2019-04-17	21.064
2019-02-12	6.5						2019-04-18	8.125
2019-02-13	11						2019-04-24	13.3824
2019-02-14	8.38333						2019-04-25	8.35
2019-02-15	10.3333						2019-04-26	24.13
2019-02-16	22.1						2019-04-27	17.35
2019-02-18	7.1						2019-04-29	33.65
2019-02-19	22.7286						2019-05-02	21.35
2019-02-20	8.5						2019-05-03	11.5
2019-02-21	6.96667						2019-05-04	16
2019-02-22	6.05						2019-05-09	16.5
2019-02-23	29.4						2019-05-12	13.0333
2019-02-24	18.1						2019-05-13	6.4
2019-02-27	11.15						2019-05-18	10.05
							2019-05-20	7.15
							2019-05-22	9.3
							2019-05-23	9.6
							2019-05-24	5.8
							2019-05-26	15.7
							2019-05-28	15.05

## Sheet: AAOD Data
Monthly distribution of aerosol absorption optical depth (AAOD) derived from AERONET and OMI instruments
Data source: AERONET (https://aeronet.gsfc.nasa.gov/cgi-bin/webtool_inv_v3) and OMI (https://giovanni.gsfc.nasa.gov/giovanni/)
Dhaka (2012-2019)						Bhola (2013-2019)
Months	AAOD-AERONET	AAOD-OMI				Months	AAOD-AERONET	AAOD-OMI
JAN	0.125138	0.0300208				JAN	0.0912233	0.0339
FEB	0.110817	0.029				FEB	0.0847644	0.0286598
MAR	0.102592	0.0255441				MAR	0.0763734	0.028
APR	0.0887292	0.0251429				APR	0.0615241	0.0263376
MAY	0.0686685	0.023				MAY	0.059	0.0266098
JUN	0.0668933	0.022				JUN	0.0422887	0.02
JUL	0.027046	0.0119214				JUL	0.01943	0.0105883
AUG	0.0411947	0.013				AUG	0.0361405	0.0157049
SEP	0.069506	0.022675				SEP	0.0406324	0.0215407
OCT	0.0848151	0.0236069				OCT	0.0504528	0.0219789
NOV	0.124382	0.0201449				NOV	0.0844945	0.0180524
DEC	0.12613	0.0245873				DEC	0.0862896	0.0256796
Mean	0.11	0.024				Mean	0.075	0.023
Standard Erro	0.001	0.001				Standard Erro	0.002	0.001

## Sheet: EDGAR Data 
	Temporal emission profiles of black carbon and PM2.5 over Bangladesh using EDGAR (Emission database for global atmospheric research) version 5.0 data for 2000-2015
	Data Source: EDGAR (Emission database for global atmospheric research) version 5.0 (https://edgar.jrc.ec.europa.eu/)
	BC	Emissions from biomass burning	Residential and other sectors						PM2.5	Emissions from biomass burning	Residential and other sectors
	2000	2.80714	18.8217						2000	30.8268	147.899
	2001	2.72942	19.181						2001	29.9753	150.712
	2002	2.78482	19.5304						2002	30.587	153.457
	2003	2.80293	19.8667						2003	30.7885	156.095
	2004	2.65657	20.1881						2004	29.1827	158.618
	2005	2.80835	20.4817						2005	30.8552	160.932
	2006	2.83611	20.7495						2006	31.1646	163.036
	2007	2.9395	20.9733						2007	32.3009	164.802
	2008	3.16952	21.2038						2008	34.8294	166.615
	2009	3.20065	21.4334						2009	35.1745	168.423
	2010	3.3029	21.7473						2010	36.2976	170.89
	2011	3.3381	22.0111						2011	36.6827	172.956
	2012	3.33449	22.2748						2012	36.642	175.028
	2013	3.39937	22.5436						2013	37.3508	177.152
	2014	3.4638	22.8181						2014	38.0542	179.31
	2015	3.44117	23.0895						2015	37.804	181.46
